# Succinate is Broadly Tissue-Permeant and Uncouples Mitochondrial Respiration from ATP Synthesis

Daniel T. Hass<sup>1</sup>, Brian M. Robbins<sup>1,2</sup>, Celia M. Bisbach<sup>1</sup>, Elizabeth Giering<sup>3</sup>, Thomas O. Mundinger<sup>3</sup>, Martin Sadilek<sup>4</sup>, Ian R. Sweet<sup>2</sup>, James B. Hurley<sup>1\*</sup>

<sup>1</sup>Biochemistry Department, The University of Washington, Seattle WA 98109

<sup>2</sup>Diabetes Institute, The University of Washington, Seattle WA 98109

<sup>3</sup>Division of Endocrinology/Metabolism, Veterans Affairs Puget Sound Health Care System, Seattle, WA

<sup>4</sup>Chemistry Department, The University of Washington, Seattle WA 98109

\*Corresponding author; contact: [jbhhh@uw.edu](mailto:jbhhh@uw.edu)

## Abstract

Succinate is a mitochondrial metabolite well known for its ability to stimulate respiration through succinate dehydrogenase. Data from multiple studies have implied that succinate localized to mitochondria and does not cross tissue boundaries. We tested this hypothesis by infusing <sup>13</sup>C-labeled succinate into the bloodstream of awake, moving C57BL6/J mice through a jugular catheter. Following the infusion we probed intermediates of glycolytic and Krebs cycle metabolism to determine how different tissues utilize succinate. We found that retina and eyecup metabolism appeared unique in their handling of succinate. The retina appeared to be the least permeant to succinate, and succinate that was taken up was not well integrated into the Krebs cycle and was rather directed to become glycolytic intermediates. In the eyecup, <sup>13</sup>C originating from succinate populated Krebs cycle intermediates particularly well. We also found that *ex vivo*, succinate stimulates mitochondrial uncoupling in eyecup tissue, which may be particularly relevant in the biology of the eye, as retina tissue secretes succinate.

## Introduction

Succinate is a key intermediate in the Krebs cycle and electron transport chain (ETC). Conversion of succinate to fumarate by succinate dehydrogenase (SDH) provides an input of electrons that reduce coenzyme Q<sub>10</sub> (QH<sub>2</sub>) in the ETC. The flow of electrons QH<sub>2</sub> to O<sub>2</sub> via ETC complexes is coupled to proton (H<sup>+</sup>) translocation from the mitochondrial matrix to the intermembrane space. Constitutive H<sup>+</sup> translocation forms a proton motive force ( $\Delta p$ ) across the inner mitochondrial membrane.  $\Delta p$  powers ATP synthesis, and transport of P<sub>i</sub>, pyruvate, glutamate, and adenine nucleotides into the mitochondrial matrix (Gutiérrez-Aguilar & Baines, 2013). By donating electrons to the ETC, succinate can help to form  $\Delta p$ .

The current literature suggests that exogenous succinate is not imported into most cells (Ehinger et al., 2016), despite widespread expression of monocarboxylate and dicarboxylate transporters capable of carrying succinate across the plasma membrane (Andrienko et al., 2017; Nakai et al., 2006; Pajor, 2014; Prag et al., 2020). Succinate is believed to be produced primarily in muscle (Hochachka & Dressendorfer, 1976), pancreas (Jang et al., 2019), and possibly by gut microbiota (Serena et al., 2018). It is thought to be consumed primarily in brown adipose tissue to fuel thermogenesis (Mills et al., 2018), though extracellular succinate also drastically increases respiration in *ex vivo* eyecup tissue (consisting of sclera, choroid, and retinal pigment epithelium) (Bisbach et al., 2020). This suggests the presence of additional cell types capable of oxidizing exogenous succinate, which may or may not be limited to eyecup tissue.

We investigated succinate metabolism in a panel of tissues *ex vivo* to determine which of them catabolize succinate, and *in vivo* to determine how that succinate is metabolized. We found that most

tissues exhibit a robust ability to oxidize succinate, with unique destinations for succinate carbons in retina and eyecup tissue. We also found that succinate uncouples mitochondrial respiration from ATP synthesis. This uncoupling is not linked with oxidative stress, adenine nucleotide transporter activity, or mitochondrial permeability transition pore complex activity, and we suggest that extracellular succinate is instead capable of directly uncoupling mitochondria through mitochondrial membrane potential-dependent increases in H<sup>+</sup>-leak.

## Materials and Methods

### *Ethical Approval*

This study was carried out in accordance with the National Research Council's Guide for the Care and Use of Laboratory Animals (8th ed). All protocols were approved by the Institutional Animal Care and Use Committees at the University of Washington and the VA Puget Sound Hospital.

### *Animals*

In all experiments, we used 2-5 month-old wild-type C57BL6/J mice. These mice were housed at an ambient temperature of 25°C, with a 12-hour light cycle and *ad libitum* access to water and normal rodent chow.

### *Small animal surgeries*

The procedure for chronic jugular vein and carotid artery catheterization was performed as previously described (Ayala et al., 2011) by the Cell Function and Analysis Core of the University of Washington's Diabetes Research Center. Briefly, following induction and maintenance under systemic inhaled anesthesia (isoflurane 1.5-2% in 1L/min), mice were administered with 4 mg/kg ketoprofen to reduce post-surgical swelling and provide analgesia. For intravenous infusions, jugular veins were isolated through a lateral incision to the trachea, and a silastic catheter was introduced into the vein, anchored to surrounding tissue, tunneled subcutaneously to the nape of the neck and connected to a vascular access port. A subset of mice received a contralateral carotid artery cannulation for blood sampling. The catheters were filled with heparinized saline, the skin incisions were sutured, and the mice recovered for 1 week before conscious infusion studies.

### *In vivo infusions*

Jugular vein infusion studies were performed on freely moving, chronically cannulated mice. This system allows us to avoid the potential confounding effects of acute surgical stress (Walters et al., 2016) or anesthesia (Windeløv et al., 2016) on succinate uptake or metabolism. We infused 100 mg/kg U-<sup>13</sup>C-succinate (Cambridge Isotopes, CLM-1571) through jugular catheters over a period of approximately 20 seconds and euthanized mice by awake cervical dislocation 1, 2, 3, 5, or 10 minutes following the infusion. When mice possessed both carotid artery and jugular vein catheters, we took two 10 µL baseline blood samples per mouse then infused 100 mg/kg U-<sup>13</sup>C-succinate through the jugular catheter. We sampled 10 µL of blood 0.5, 1, 2, 3, 4, 5, 7.5, and 10 minutes following the infusion, then euthanized mice. Following euthanasia we quickly dissected retinas and eyecups (a complex of the retinal pigment epithelium, sclera, and choroid vasculature) from the eye. For the 5 minutes post-infusion time point, we also dissected liver, lung, cerebellum, interscapular white adipose tissue, and interscapular brown adipose tissue. Dissected tissues were snap frozen in liquid N<sub>2</sub>. All mice were euthanized between 10 AM and 1 PM to minimize circadian effects on metabolic function.

### *Ex vivo metabolic flux*

In all *ex vivo* labeling experiments, we quickly euthanized mice by awake cervical dislocation, dissected the indicated tissues in Hank's Buffered Salt Solution (HBSS; GIBCO, Cat#: 14025-076), and incubated them in pH 7.4 Krebs-Ringer bicarbonate (KRB) buffer (98.5 mM NaCl, 4.9 mM KCl,

02 1.2 mM  $\text{KH}_2\text{PO}_4$ , 1.2 mM  $\text{MgSO}_4 \cdot 7\text{H}_2\text{O}$ , 20 mM HEPES, 2.6 mM  $\text{CaCl}_2 \cdot 2\text{H}_2\text{O}$ , 25.9 mM  $\text{NaHCO}_3$ )  
03 supplemented with 5 mM glucose and [ $^{13}\text{C}$ ]-succinic acid (Cambridge isotope CLM-1571-0.1;  
04 concentrations indicated in figures). This buffer was pre-equilibrated at 37°C, 21%  $\text{O}_2$ , and 5%  $\text{CO}_2$   
05 prior to incubations. Following incubations, tissue was flash frozen in liquid nitrogen.

### 06 *Metabolite Extraction*

07 Metabolites were extracted using 80% MeOH, 20%  $\text{H}_2\text{O}$  supplemented with 10  $\mu\text{M}$  methylsuccinate  
08 (Sigma, M81209) as an internal standard to adjust for any metabolite loss during the extraction and  
09 derivatization procedures. The extraction buffer was equilibrated on dry ice, and 150  $\mu\text{L}$  was added to  
10 each sample. Tissues were then disrupted by sonication and incubated on dry ice for 45 minutes to  
11 precipitate protein. Proteins were pelleted at 17,000 x g for 30 minutes at 4°C. The supernatant  
12 containing metabolites was lyophilized at room-temperature until dry and stored at -80°C until  
13 derivatization. The pellet containing protein was resuspended by sonication in RIPA buffer (150 mM  
14 NaCl, 1.0% Triton X-100, 0.5% sodium deoxycholate, 0.1% SDS, 50 mM Tris, pH 8.0) and the  
15 amount of protein was determined by a BCA assay (ThermoFischer, 23225).

### 16 *Metabolite Derivatization*

17 Lyophilized samples were first derivatized in 10  $\mu\text{L}$  of 20 mg/mL methoxyamine HCl (Sigma, Cat#:  
18 226904) dissolved in pyridine (Sigma, Cat#: 270970) at 37°C for 90 minutes, and subsequently with  
19 10  $\mu\text{L}$  tert-butyldimethylsilyl-N-methyltrifluoroacetamide (Sigma, Cat#: 394882) at 70°C for 60  
20 minutes.

### 21 *Gas Chromatography-Mass Spectrometry*

22 Metabolites were analyzed on an Agilent 7890/5975C GC-MS using selected-ion monitoring methods  
23 described extensively in previous work (Du et al., 2015). Peaks were integrated in MSD ChemStation  
24 (Agilent), and correction for natural isotope abundance was performed using the software IsoCor  
25 (Millard et al., 2019). Corrected metabolite signals were converted to molar amounts by comparing  
26 metabolite peak abundances in samples with those in a 'standard mix' containing known quantities of  
27 metabolites we routinely measure. Multiple concentrations of this mix were extracted, derivatized, and  
28 run alongside samples in each experiment. These known metabolite concentrations were used to  
29 generate a standard curve which allowed for metabolite quantification. Metabolite abundance was  
30 normalized to tissue protein concentration, and following this, paired tissues such as retinas and  
31 eyecups from the same mouse were treated as technical replicates and averaged.

### 32 *Ex vivo oxygen consumption*

33 Following euthanasia, mouse tissues were dissected and cut into small segments in Hank's buffered  
34 salt solution. These tissues were incubated in Krebs-Ringer bicarbonate buffer (KRB) supplemented  
35 with 5 mM glucose and pre-equilibrated at 37°C and 5%  $\text{CO}_2$ . We determined OCR using a custom-  
36 built perfusion flow-culture system (Sweet et al., 2002; Neal et al., 2015). Tissues were perfused in  
37 chambers between Cytopore beads (Amersham Biosciences, Piscataway, NJ) and porous frits. With  
38 KRB supplemented with 5 mM glucose, 1x Antibiotic-Antimycotic (Gibco), and 0.1 g/ 100 mL fatty  
39 acid-free bovine serum albumin. An artificial lung oxygenated supplemented KRB with a mixture of  
40 21%  $\text{O}_2$ , 5%  $\text{CO}_2$ , and 74%  $\text{N}_2$ , and this media was passed through a bubble trap before moving  
41 through the chambers containing mouse tissues. Outflow media came into contact with a glass wall  
42 coated with a thin layer of oxygen sensitive polymerized Pt(II) Meso-tetra(pentafluorophenyl)porphine  
43 dye (Frontier Scientific, Logan, UT) painted on the inner glass wall of the chamber. Following a 405  
44 nm light pulse, the dye-coated glass emits a phosphorescent signal detected at 650 nm. The decay  
45 lifetime is dependent on oxygen tension. The flow rate of KRB along with the quantitative relationship  
46 between dye phosphorescent decay and oxygen concentration were used to determine tissue OCR.  
47 All OCR measurements were obtained under control conditions (baseline, 5 mM glucose), one or  
48  
49  
50  
51

52 more experimental conditions, and a ‘zeroed’ condition wherein 3 mM potassium cyanide (KCN) was  
53 used to directly inhibit complex IV and thus subtract the effect of residual non-mitochondrial oxygen  
54 consumption from our measurements.

### 55 *Western Blot*

56 Protein was extracted by sonication in RIPA buffer supplemented with a protease and phosphatase  
57 inhibitor cocktails (ThermoFisher, Cat#: 78442). SDS sample buffer was added and samples were run  
58 on 13% polyacrylamide gels. After running, gels were transferred onto PVDF membranes (Millipore,  
59 IPFL00010) and rinsed with PBS. Primary antibody (anti-Total Oxphos, 1:1000 dilution, RRID:  
60 AB\_2629281, Lot# P3338) was diluted in blocking buffer (LI-COR, 927–40,000) and incubated  
61 overnight on blots at 4°C. Membranes were washed twice with PBS containing 0.1% Tween-20 and  
62 once with PBS, then incubated with secondary antibody (IRDye 800CW goat anti-mouse IgG (H + L)  
63 (LI-COR Biosciences, 925-32210, RRID: AB\_2687825) at 1:5000 in blocking buffer for 1 h at RT and  
64 washed again before imaging. Membranes were imaged and bands were quantified using the LI-COR  
65 Odyssey CLx Imaging System (RRID:SCR\_014579).

### 66 *Statistical Analysis [Incomplete]*

67 We performed all statistical data analysis using Prism Version 8 (GraphPad Software). We fit curves  
68 of [m+4 succinate] over time with a one-phase exponential decay equation (after time = 0 minutes) to  
69 determine the half-life of infused m+4 succinate in blood. To fit curves of oxygen consumption as a  
70 function of [succinate], for each sample we averaged steady-state oxygen consumption over >5  
71 minutes at the end of a given treatment. These averaged values were considered to be the OCR at  
72 each given [succinate] for each sample. We fit the curve to an allosteric sigmoidal shape in order to  
73 obtain approximations of  $V_{max}$ ,  $K_{1/2}$ , and Hill’s coefficient (h).

## 74 **Results**

### 75 *Extracellular Succinate Promotes O<sub>2</sub> Flux Ex Vivo*

76 In the conventional Krebs cycle, succinate dehydrogenase oxidizes succinate to fumarate. The  
77 hydrogen atoms removed from succinate reduce coenzyme Q<sub>10</sub>. Electrons from reduced coenzyme  
78 Q<sub>10</sub> (QH<sub>2</sub>) are transferred to cytochrome C then to O<sub>2</sub>, forming H<sub>2</sub>O (**Figure 1A**). Oxidation of  
79 succinate by this pathway stimulates O<sub>2</sub> consumption. We measured mitochondrial O<sub>2</sub> consumption  
80 rate (OCR) by quantifying KCN-sensitive changes in OCR. KCN is an inhibitor of cytochrome oxidase  
81 (complex IV) the mitochondrial enzyme that converts O<sub>2</sub> to H<sub>2</sub>O. We determined the OCR as a  
82 function of extracellular succinate concentration in modified Krebs-Ringer Bicarbonate (KRB) buffer  
83 supplemented with 5 mM glucose (**Figure 1B-H**). Examples of the data obtained in typical  
84 experiments are pictured in **Figure 1B**. In ex vivo liver, cerebellum, BAT, kidney, eyecup (a complex  
85 of retinal pigment epithelium, choroid, and sclera), and retina tissue, increasing succinate  
86 concentrations (30 μM, 100 μM, 300 μM, 1 mM, 3 mM, 10 mM, 30 mM, and 100 mM) stimulated  
87 OCR. To remove the contribution of glucose to mitochondrial respiration, we subtracted the basal  
88 respiration (OCR with 5 mM glucose alone) from succinate-stimulated OCR to obtain pseudo-kinetic  
89 curves of OCR as a function of succinate concentration (**Figure 1C-H**). We fit these curves with an  
90 allosteric sigmoidal function, and found  $K_{1/2}$  values ranging from 0.9-2.77 mM (**Table 1**) for all tissues  
91 except the retina, which had a  $K_{1/2}$  of 11.14 mM. This unusually high  $K_{1/2}$  estimate is a lower limit  
92 generated by curve fitting because the retinal OCR did not reach saturation at the succinate  
93 concentrations used in our experiments. The unusual concentration-dependence of succinate-  
94 stimulated OCR in the retina suggests that mitochondrial metabolism of exogenous succinate is  
95 substantially different between the retina and other tissues. Succinate can stimulate the SUCNR1, a  
96 G-protein coupled receptor that stimulates a multitude of metabolic effects (Prag et al., 2020; Wang et  
97  
98  
99  
100  
101



al., 2020). However, the SUCNR1 agonist, cis-epoxysuccinate (500  $\mu$ M), did not stimulate O<sub>2</sub> consumption (**Figure S1**).

### *Infused Succinate is Metabolized In Vivo*

*Ex vivo* experiments are a powerful means by which to approximate the physiology of succinate *in vivo*, but the tissue isolation process may impact cell integrity and thus plasma membrane or mitochondrial succinate permeability. We tested whether succinate import into cells occurs *in vivo* by infusing male and female C57BL6/J mice with a 100 mg/kg bolus of uniformly labeled (U)-<sup>13</sup>C succinate dissolved in sterile saline (pH 7.4). We first infused mice with dual carotid artery and jugular vein catheters. We withdrew two 10  $\mu$ L baseline whole blood samples through the carotid catheter, then infused labeled succinate through the jugular catheter. We sampled 10  $\mu$ L of blood at 0.5, 1, 2, 3, 4, 5, 7.5, and 10 minutes following the infusion and used gas chromatography–mass spectrometry (GC-MS) to measure the accumulation of <sup>13</sup>C on metabolites in glycolysis and the Krebs cycle (**Table 2**). Total blood U-<sup>13</sup>C-succinate levels (noted in figures as m+4 because it contains four <sup>13</sup>C-labeled carbon atoms) spiked immediately following infusion and rapidly declined throughout the 10-minute process (**Figure 2A**). A single exponential fit of m+4 succinate over time shows that infused succinate reached a half maximal concentration at 0.88 (95% CI: 0.04 - 3.32) minutes post-infusion, which is more rapid than consumption of infused glucose (Parilla et al., 2018). The dominant isotopologue in blood was m+4, showing that for at least 10 minutes following the bolus infusion, tissues have access to a pool of almost fully labeled succinate (**Figure 2B**). A molecule in blood spectrally overlaps with m+4 succinate. It can interfere with a completely accurate estimation of succinate isotopologue distribution. However, this signal contaminant contributes ~3.7% of the m+4 succinate signal 10 minutes following infusion, so it does not cause major errors in the isotopic correction algorithm in post-infusion blood samples. Following the bolus infusion, m+4 labeling also appears in circulating fumarate and malate pools, and is cleared by the time m+4 succinate is (**Figure S2**).

Five minutes after infusion, m+4 succinate labels the retina, cerebellum, eyecup, liver, lung, interscapular brown adipose tissue (BAT), and interscapular white adipose tissue (WAT) (**Figure 2C**). We estimated succinate turnover in these tissues from the fraction of succinate that is m+4. Fractional labeling was highest in blood, eyecup, lung, BAT, and WAT, with relatively minimal fractional labeling of succinate in retina, cerebellum, or liver (**Figure 2D**). Fractional labeling depends on overall succinate pool size and a low fractional labeling does not necessarily mean a tissue is not metabolizing succinate. We also estimated succinate catabolism in this tissue panel by summing the molar abundance of <sup>13</sup>C (originating from U-<sup>13</sup>C-succinate) on all metabolites that we routinely measure. We normalized this quantity to the molar abundance of <sup>12</sup>C in the same sample (**Figure 2E**). A substantial portion of metabolites in eyecup, brown adipose tissue, and blood were labeled with <sup>13</sup>C. A list of these metabolites is available in **Table S2**, succinate itself was excluded from this analysis of downstream metabolism. Retina accumulated less succinate than other tissues, whereas succinate was enriched in lung and eyecup (**Figure 2C-D**), suggesting a relatively small succinate pool with high flux. On the other hand, tissues which accumulated similar amounts of intermediates downstream from succinate (cerebellum, liver, BAT, WAT) had lower overall replacement of the labeled succinate fraction, which implies a larger and perhaps more stationary succinate pool.

<sup>13</sup>C from succinate labeled the downstream intermediate fumarate, malate, aspartate, citrate, and pyruvate in all tissues to varying degrees. Enrichment of <sup>13</sup>C-label on these metabolites is correlated with the amount of m+4 succinate present in the tissue (**Figure S3**). To compare how succinate is used among different tissue types, we normalized the abundance of these labeled metabolites to m+4 succinate. **Figure 2F** shows the isotopologues expected to appear in tissues following conventional Krebs cycle-mediated succinate catabolism. 5-minutes post-infusion we find these labeled

metabolites do accumulate, with relatively low labeling of downstream Krebs cycle intermediates in blood compared to within tissues (**Figure 2G-K**). In this panel, m+4 label from succinate accumulates as fumarate to the greatest extent in eyecups, implying that succinate oxidation may be faster in eyecup tissue than others (**Figure 2G**). Additionally, normalized to m+4 succinate, we found a roughly equivalent proportion of m+4 fumarate in the retina as many other tissues, suggesting that the poor responsiveness of the retina to succinate observed *ex vivo* occurs at the level of succinate import rather than oxidation to fumarate. Higher m+4 fumarate in eyecups also leads to more labeling in downstream intermediates such as malate (**Figure 2H**), citrate (**Figure 2I**), and aspartate (**Figure 2J**). These data suggest that SDH is twice as active in eyecups than in other tissues. We asked if the tissue differences are related to the abundance of mitochondrial content across different tissues. We measured the relative abundances of complex I, II, III, IV and V (ATP synthase) component proteins and found that eyecup SDHB levels are equal to or lower than most other tissues in the panel. This suggests that m+4 fumarate labeling is not directly linked to expression of SDHB (**Figure S4**).

Eyecups metabolize succinate similarly to other tissues, but to a greater extent per molecule of succinate. Unexpectedly, retina and no other tissue incorporates  $^{13}\text{C}$  from m+4 succinate into m+3 pyruvate (**Figure 2K**). This suggested decarboxylation of either malate or oxaloacetate made from succinate. Since succinate catabolism in the retina and eyecup are so distinct and because these tissues are adjacent in the eye we investigated the relationship between retina and eyecup succinate metabolism *in vivo*. We followed  $^{13}\text{C}$  flux in these tissues 1, 2, 3, 5, and 12 minutes following infusion of 100 mg/kg U- $^{13}\text{C}$  succinate.

#### *Succinate Infusion Reveals Metabolic Specialization in the Retina and Eyecup*

Initially, m+0 and m+4 succinate are the principal isotopologues in the retina and RPE following infusion. The decay of m+4 succinate following the bolus infusion represents entry of carbons from succinate into intracellular metabolic pathways. In the 12 minutes post-infusion, the eyecups metabolize ~40% of their m+4 succinate pool (**Figure 3A**), whereas retinas metabolize only ~5% of their pool (**Figure 3B**). As a consequence of higher m+4 succinate turnover in eyecups, downstream m+4 or m+3 isotopologues of malate (**Figure 3D**), aspartate (**Figure 3G**), citrate (**Figure 3J**),  $\alpha$ -ketoglutarate (**Figure 3M**), isocitrate (**Figure S5A**), and glutamate (**Figure S5D**) accumulate to a greater extent in eyecup than retina, showing that the conventional Krebs cycle is highly active in this tissue. Lower retina succinate import and label turnover yielded lower % labeling patterns in downstream metabolic intermediates such as malate and citrate (**Figure 3E,K**).

M+0 and m+4 succinate are the principal isotopologues in the retina and eyecup following infusion, and decay following the bolus infusion as succinate carbons flow into different metabolic pathways. This decay suggests that in the 11 minutes between 1 and 12 minutes post-infusion, ~40% of the eyecup m+4 succinate pool is turned over (**Figure 3A**), whereas only ~5% of the pool is turned over in retinas (**Figure 3B**). As a consequence of higher m+4 succinate turnover in eyecups, downstream m+4 or m+3 isotopologues of malate (**Figure 3D**), aspartate (**Figure 3G**), citrate (**Figure 3J**),  $\alpha$ -ketoglutarate (**Figure 3M**), isocitrate (**Figure S5A**), and glutamate (**Figure S5D**) accumulate more rapidly in eyecup than retina, showing that the conventional Krebs cycle is highly active in this tissue. Lower retina  $^{13}\text{C}$ -succinate import limits label turnover yielded lower % labeling patterns in downstream metabolic intermediates such as malate and citrate (**Figure 3E,K**), though poor labeling of Krebs cycle intermediates may also be influenced by alternate metabolic pathways.

The absence of m+4 labeled aspartate and citrate, representing Krebs cycle intermediates downstream of succinate and malate suggests that either (a) carbons from malate in the retina are not oxidized to oxaloacetate, (b) that oxaloacetate is diverted away from reactions that form citrate or

02 aspartate, or (c) oxaloacetate does indeed become citrate, but the citrate pool is very large in  
03 comparison to the malate pool and dilutes the m+4 label. Analysis of pool sizes suggested that the  
04 retina citrate pool is not larger than the malate pool, so we investigated alternate metabolic pathways  
05 for malate carbons (**Figure 3**). We noticed that both in the retina and eyecup there was a steady  
06 accumulation of  $^{13}\text{C}$  as m+3 pyruvate, phosphoenolpyruvate (PEP), and 3-phosphoglycerate (3PG)  
07 (**Figure 4A-H**). Accumulation of  $^{13}\text{C}$  on these intermediates suggests gluconeogenic activity in both  
08 the retina and eyecup, most likely due to activity of the enzyme phosphoenolpyruvate carboxykinase  
09 (*PEPCK*), which catalyzes decarboxylation of oxaloacetate (m+4 labeled if its carbons originated as  
10 infused succinate) to m+3 phosphoenolpyruvate and m+1  $\text{CO}_2$ . The PEP can then become m+3 3PG  
11 through the reversible steps of glycolysis, or m+3 pyruvate through activity of pyruvate kinase. M+3  
12 3PG labeling in both tissues was unexpected, though because the eyecup far exceeds retina tissue in  
13 % succinate labeling yet generates a lower % 3PG, we believe gluconeogenic activity is far greater in  
14 retina tissue. This reaction scheme (**Figure 4I**) requires that m+4 oxaloacetate be formed before  
15 becoming m+3 PEP, and our data thus support possibility (b), though they do not rule out the  
16 potential impact of malic enzyme activity, which can form m+3 pyruvate from m+4 malate. A  
17 comparison of m+3 PEP labeling / m+4 succinate labeling in our tissue panel shows that retina,  
18 eyecup, and cerebellum are the main tissues forming m+3 PEP from succinate, while liver (a tissue  
19 known for high *PEPCK* expression) did not accumulate any detectable m+3 PEP. This implies that  
20 the liver is not performing gluconeogenesis that utilizes succinate as a substrate in our experiments  
21 (**Figure 4J**).

23 In the eyecup, m+2 labeling of metabolic intermediates from m+4 succinate is likely a consequence of  
24 conventional Krebs cycle activity, which due to isocitrate and  $\alpha$ -ketoglutarate dehydrogenase  
25 activities removes two  $^{13}\text{C}$ s from the succinate backbone as  $^{13}\text{CO}_2$ . However, these reactions are  
26 unlikely to be the main source of m+2 labeling of Krebs cycle intermediates in the retina, because  
27 citrate pool is poorly m+4 labeled (**Figure 3K**), meaning that retina utilizes an unlabeled pool of  
28 oxaloacetate to form citrate. M+2 labeling on retina citrate is likely related to *PEPCK* activity. When  
29 the retina makes m+3 PEP from oxaloacetate, m+3 PEP can form m+3 pyruvate (**Figure 2K, 4B**),  
30 and pyruvate dehydrogenase (PDH) can utilize m+3 pyruvate to make m+2 labeled acetyl-CoA and  
31 m+1  $\text{CO}_2$  (**Figure XYZ**). That means that retina m+2 citrate is likely to be made by the condensation of  
32 m+2 acetyl-CoA and unlabeled oxaloacetate.

34 M+3 PEP formation from *PEPCK* requires an m+4 oxaloacetate, and yet if there is m+4 oxaloacetate  
35 available to make m+3 PEP, that m+4 oxaloacetate should also be available to make m+4 citrate. Yet  
36 we do not see substantial accumulation of m+4 citrate, suggesting that within the retina, production of  
37 m+3 PEP (from labeled oxaloacetate) and m+2 citrate (from unlabeled oxaloacetate) occur in  
38 different metabolic compartments, with the unlabeled oxaloacetate most likely coming from a cell type  
39 that does not take up external m+4 succinate. This model may explain the lack of m+6 citrate (**Figure**  
40 **3K**), as m+2 acetyl-CoA is formed in a compartment different than the one where m+4 oxaloacetate is  
41 formed. The m+2 citrate goes on to make m+2  $\alpha$ -ketoglutarate (**Figure 3N**), and m+2 malate (**Figure**  
42 **3E**). Our metabolic flux data represents the summed activities of multiple retina cell types, and while  
43 our data does not reveal the identity of the particular cell which takes up succinate and uses it to form  
44 PEP, it does distinguish that activity from a separate cell which uses PEP-derived pyruvate to make  
45 citrate. These data reveal metabolic communication between different cell types, likely at the level of  
46 pyruvate import and export, as there are numerous transporters able to shuttle labeled pyruvate  
47 between cells.

49 The presence of gluconeogenesis in the eye can explain m+1 labeling on  $\alpha$ -ketoglutarate, isocitrate,  
50 citrate, and malate (**Figure 3**). Decarboxylation of m+4 oxaloacetate or m+3 pyruvate by *PEPCK* or  
51 PDH generates m+1  $\text{CO}_2$ , and any reaction in which carboxylation may occur can transfer this m+1

CO<sub>2</sub> to generate an m+1 labeled metabolite. There are two main carboxylation reactions known to interact with the Krebs cycle: (1) pyruvate carboxylation to oxaloacetate, and (2) reductive carboxylation of  $\alpha$ -ketoglutarate. Both retinal  $\alpha$ -ketoglutarate and isocitrate are m+1 labeled to a similar extent, suggesting that the isocitrate dehydrogenase reaction does not proceed in the reductive direction. Rather, pyruvate carboxylation is the more likely cause of m+1 labeling on Krebs cycle intermediates in the retina.

We attempted to confirm this gluconeogenic activity in *ex vivo* retina and eyecups incubated in 5 mM glucose + 50  $\mu$ M U-<sup>13</sup>C succinate for 0, 0.5, 1, 2, and 5 minutes, yet in both tissues we were unable to find substantial <sup>13</sup>C labeling on 3-PG, suggesting that whatever factors enable gluconeogenesis *in vivo* are not recapitulated in our *ex vivo* culture system (**Figure S6**).

### *Succinate Stimulates Mitochondrial Uncoupling in Eyecup Tissue*

Eyecup succinate catabolism reveals rapid Krebs cycle (**Figure 2**) and electron transport chain (**Figure 1**) flux which matches that of many other tissues, per unit mass. The extent to which increasing concentrations of succinate stimulates mitochondrial O<sub>2</sub> flux (**Figure 1**) is surprising, as the capacity of tissues to oxidize mitochondrial substrates is generally thought to be limited by the mitochondrial proton motive force ( $\Delta p$ ). Excess substrate increases  $\Delta p$ , leading to autoregulation of mitochondrial substrate oxidation. We validated this phenomenon using the conventional mitochondrial substrate pair pyruvate/malate. By increasing the concentration of these substrates and measuring eyecup OCR, we showed that these NADH-linked substrates is limited and was maximal at ~3 mM pyruvate + 3 mM malate (**Figure 5A**).

Succinate oxidation also increases OCR, but succinate oxidation is self-limiting at far higher substrate concentrations (~30 mM, **Figure 1**). However, succinate oxidation and NADH oxidation result in different levels of mitochondrial H<sup>+</sup> flux and thus  $\Delta p$  per O<sub>2</sub> molecule is diminished. We converted substrate-dependent OCR (**Figure 5A**) into estimates of H<sup>+</sup> flux, assuming (1) all OCR above the 5 mM glucose 'baseline' is from oxidation of the supplied substrate, and (2) that each O<sub>2</sub> molecule consumed using NADH linked substrates catalyzed translocation of 10 H<sup>+</sup> while succinate-dependent OCR translocated to an H<sup>+</sup>/O<sub>2</sub> ratio of 6 (**Figure 5B**). Concentration response curves from these two substrates show overlapping H<sup>+</sup> translocation rates at substrate concentrations of 300  $\mu$ M and lower, but substrate-dependent deviations in H<sup>+</sup> flux at [substrate]  $\geq$  1 mM. This mismatch in H<sup>+</sup> flux across complexes I-IV between substrates suggests that exogenous succinate produces a H<sup>+</sup> leak current across the inner mitochondrial membrane that is compensated for by additional substrate oxidation (and thus additional movement of H<sup>+</sup>). We determined whether succinate produces H<sup>+</sup> leak by exposing eyecup tissue to either 5 mM succinate or 5 mM pyruvate/malate in the presence of the ATP synthase inhibitor oligomycin. Oligomycin inhibits O<sub>2</sub> consumption by preventing dissipation of  $\Delta p$  by the ATP synthase. O<sub>2</sub> consumption in the presence of oligomycin represents substrate oxidation that is not inhibited by  $\Delta p$  (because a H<sup>+</sup> leak conductance is able to take the place of H<sup>+</sup> conductance through ATP synthase). 5 mM succinate substantially enhanced OCR in the presence of oligomycin, while 5mM pyruvate/malate is far less effective. Leak respiration occurs at high concentrations of either metabolite, but to a gfar greater extent with succinate (**Figure 5C**).

We determined the extent to which succinate stimulates oligomycin-insensitive OCR by titrating succinate in the presence of oligomycin (**Figure 5D**). Increases in leak respiration occur at concentrations  $\geq$  300  $\mu$ M succinate. Multiple mechanisms may drive succinate dependent H<sup>+</sup> leak, including (a) reactive oxygen species-induced activation of an uncoupling protein [cite], (b) activation



of H<sup>+</sup> leak through the adenine nucleotide translocase (ANT) [cite], (c) activation of the mitochondrial permeability transition pore complex (mPTP) [cite]. We stimulated succinate dependent H<sup>+</sup> leak by exposing eyecup tissue to 5 mM glucose, 10 μM oligomycin, and 5 mM succinate, and attempted to prevent succinate-stimulated leak respiration in (a)-(c) using inhibitors of oxidative stress (50 μM mitoTempo, 10 mM N-acetylcysteine; **Figure 5E**), the ANT (30 μM carboxyatractyloside; **Figure 5F**), or the mPTP complex (2 μM cyclosporine A; **Figure 5G**). None of these compounds suppressed succinate-dependent leak respiration. We also tested whether succinate-dependent leak respiration occurs due to reverse complex I activity, which could oxidize coenzyme Q<sub>10</sub>, reduce NAD<sup>+</sup>, and transport H<sup>+</sup> from the mitochondrial intermembrane space to the matrix. The complex I Q-site inhibitor rotenone partially suppressed leak respiration (**Figure 5H**). We initially considered this to be a consequence of inhibiting complex I reversal fueled by succinate-dependent reduction of the coenzyme Q<sub>10</sub> pool. However, the effect of rotenone also could be explained by cutting off the supply of electrons from NADH that partially contributes to OCR. Glucose from the perfusion medium fuels cytosolic NADH production via glycolysis and mitochondrial NADH through pyruvate oxidation. We evaluated the contribution of glucose to OCR by removing it from the medium. If succinate causes complex I to operate in reverse, removing glucose would either not alter H<sup>+</sup> leak or increase it, and rotenone would still inhibit succinate-stimulated, oligomycin-insensitive OCR. Alternatively, if complex I operates in the forward mode, removing glucose removal would partially decrease OCR and prevent rotenone from affecting OCR. We found that glucose removal itself partially suppressed OCR and prevented rotenone from affecting OCR (**Figure 5I**). That indicates that the effect of succinate on H<sup>+</sup> leak is not caused by reversal of proton pumping through complex I.

## Discussion

Succinate is a metabolite well characterized for its capability to stimulate O<sub>2</sub> consumption in isolated mitochondria [cite]. However, the ability of succinate to cross the plasma membrane and induce a physiological effect is debated. We show that diverse tissues can import and oxidize succinate (**Figure 1-2**). Succinate catabolism has tissue-specific metabolic effects, and can feed both conventional Krebs cycle activity and gluconeogenesis in distinct tissues (**Figure 3-4**). By acting in the Krebs cycle, succinate fuels mitochondrial O<sub>2</sub> consumption, and this occurs over a large range of succinate concentrations, with concentrations as high as 1 mM fueling not only conventional Krebs cycle activity, but also by allowing Krebs cycle and electron transport to continue without inhibition from feedback caused by buildup of the proton gradient (**Figure 5**).

Our *ex vivo* data shows a dynamic responsiveness of different tissues to extracellular succinate (**Figure 1**). Although succinate-dependent SUCNR1 activity is responsible for multiple effects *in vivo*, a potent agonist (Geubelle et al., 2017) did not alter OCR, suggesting that OCR depends primarily on the reducing power of succinate (**Figure S1**). The response to succinate is concentration-dependent, with a half-maximal effect on OCR between 0.9 and 2.7 mM in all tissues except retina (**Table 1**), wherein OCR depended only weakly on succinate (**Figure 1H**). Along with our *in vivo* flux data, this suggests a barrier to retinal succinate import. This unique behavior of the retina is consistent with our previous finding that retina tissue normally synthesizes and exports succinate (Bisbach et al., 2020). Exported succinate may act as a concentration gradient that opposes succinate import.

Succinate-stimulated OCR by non-retina tissues in our experiment are consistent similar findings in *ex vivo* dog heart and rabbit kidney tissue, where. In these tissues succinate also stimulates OCR (Furchgott & Shorr, 1948). However our findings are not consistent with the more frequently cited sentiment that succinate does not alter OCR in most cultured cells (Ehinger et al., 2016; MacDonald et al., 1989; Mills et al., 2018). Studies reporting succinate inaccessibility were mainly performed on cultured cells, and long-term cell culture may alter the expression of metabolite transporters (Hanu et

50 al., 2000). The transporters for succinate have not been fully characterized, and in addition to plasma  
51 membrane dicarboxylate transporters (Kaufhold et al., 2011), MCT1 can also export succinate (Prag  
52 et al., 2020; Reddy et al., 2020). This may apply to other MCTs as well. Therefore we can only  
53 explain the discrepancy in plasma membrane succinate permeability after we determine the  
54 expression patterns and transport activities of mono- and di-carboxylate transporters in cultured cells  
55 and animal tissue.

56  
57 Our kinetic analysis (**Table 1**) reflects a combination of succinate transport across the plasma  
58 membrane, succinate transport into the mitochondrial matrix, oxidation by succinate dehydrogenase  
59 (SDH), and electron transport to O<sub>2</sub>. One or more of these could be rate-limiting. K<sub>1/2</sub> simply conveys  
60 the dynamic range over which different tissues respond to succinate. While all tissues we tested take  
61 up succinate, liver, BAT, and kidney tissue are more sensitive to it than cerebellum, eyecup, and  
62 retina. This may be of less concern for retina (which produces succinate) and eyecup (which likely  
63 receives retina-produced succinate). The V<sub>max</sub> (obtained at 30-100 mM succinate) may represent a  
64 capacity for mitochondria to oxidize succinate, yet because circulating [succinate] only exceeds 300  
65 μM under extreme circumstances such as hypoxia (Hochachka et al., 1975), it is less likely to  
66 represent an OCR that occurs naturally.

67  
68 Because there are caveats with ex vivo experiments, we probed succinate physiology *in vivo*. We  
69 infused a bolus of U-<sup>13</sup>C-succinate into freely moving catheterized mice (**Figure 2-4**). This approach  
70 complements our ex vivo OCR and flux data by probing succinate intake into cells in a physiological  
71 context. Metrics of succinate pool turnover (**Figure 2D**) and oxidation (**Figure 2E**) show that  
72 succinate is metabolized to the greatest extent in eyecup, lung, and BAT. RPE cells have a very high  
73 degree of vascular access relative to their abundance, and simple access to succinate may explain  
74 why they oxidize it so well. The <sup>13</sup>C-labeling approach metrics may even underestimate succinate  
75 oxidation in eyecup, as RPE cells may also receive an unlabeled succinate supply produced by the  
76 retina (Bisbach et al., 2020). Lung tissue also has high vascular access that may explain why m+4  
77 succinate populates the lung succinate pool so quickly. In BAT other mechanisms may contribute to  
78 rapid succinate utilization. For example, basal uncoupling could accelerate Krebs cycle activity so that  
79 succinate is oxidized quickly to fuel thermogenesis (Mills et al., 2018).

80  
81 Retina and eyecup tissue are specialized in how they utilize succinate carbons (**Figure 2G-K**). Label  
82 from <sup>13</sup>C-succinate (**Figure 2**) accumulated in intermediates from both the Krebs cycle and glycolysis,  
83 suggesting that a portion of succinate is siphoned off from the Krebs cycle to make, pyruvate, PEP  
84 and 3-PG. The portion of <sup>13</sup>C that originated as succinate and entered glycolysis is more substantial  
85 in the retina than the eyecup (**Figure 4**), suggesting that gluconeogenesis may occur in both tissue  
86 but may govern retina metabolism to a greater extent.

87  
88 Several Krebs cycle intermediates in both tissues were found labeled with one <sup>13</sup>C. Pyruvate  
89 carboxylase in gluconeogenic tissue carboxylates pyruvate to form oxaloacetate. <sup>13</sup>CO<sub>2</sub> is a product  
90 of both gluconeogenic and Krebs cycle enzymes, and the likely origin for this m+1 metabolite labeling  
91 is carboxylation of <sup>13</sup>CO<sub>2</sub> catalyzed by pyruvate carboxylase to produce m+1 oxaloacetate. That this  
92 carboxylation resulted in equivalent labeling of malate and citrate compared with m+2 labeling from  
93 acetyl-CoA suggests that carboxylation in the retina and eyecup can keep pace with canonical carbon  
94 entry into the Krebs cycle and may in fact be a prevalent reaction.

95  
96 Succinate oxidation and downstream Krebs cycle activity are rapid in eyecups (**Figure 2**),. That is  
97 surprising because succinate-dependent electron flux through complexes III and IV increase Δp, and  
98 a high Δp limits mitochondrial substrate oxidation. Oligomycin further simulates this feedback by  
99 blocking mitochondrial matrix proton influx through ATP synthase, causing Δp to build to the point

00 where NADH oxidation by complex I and O<sub>2</sub> reduction by complex IV are not thermodynamically  
01 favorable. Respiration in the presence of oligomycin requires H<sup>+</sup> leak to partially relieve the block on  
02 respiratory chain activity. Our experiments show that oligomycin blocks glucose-stimulated respiration  
03 in eyecup tissue, and succinate overcomes the block, suggesting that it may dissipate  $\Delta p$  or decrease  
04 the resistance of the mitochondrial membrane to H<sup>+</sup>. NADH-linked substrates pyruvate and malate  
05 cannot mimic this large increase in mitochondrial respiration, suggesting that H<sup>+</sup> leak is unique to the  
06 biochemistry of succinate (**Figure 5A-B**). We titrated succinate in the presence of oligomycin and  
07 found that even low concentrations of extracellular succinate (<100  $\mu$ M) can fuel leak respiration in  
08 the presence of oligomycin (also known as mitochondrial uncoupling).

09  
10 We investigated the mechanism of succinate-induced uncoupling. Antioxidants, cyclosporine A, and  
11 carboxyatractyloside did not block oligomycin resistant OCR in eyecup tissue. Succinate-stimulated  
12 OCR is independent of oxidative stress-stimulated uncoupling protein activity, adenine nucleotide  
13 translocator (ANT) activity, and mitochondrial permeability transition pore complex activity (**Figure**  
14 **5E-G**). Only rotenone inhibits succinate-stimulated, oligomycin-resistant OCR (**Figure 5H**). However,  
15 we found this effect simply reflects the loss of reducing power from glucose-derived NADH (**Figure**  
16 **5I**). Together these data suggest that oligomycin stops complex I-driven OCR, yet this OCR resumes  
17 in the presence of succinate.

18  
19 These results still do not explain the apparent H<sup>+</sup> leak in eyecup mitochondria; they only confirm that  
20 succinate consistently stimulates OCR in the presence of oligomycin. While we focus on eyecup  
21 tissue in this study, previous reports have demonstrated an exponential relationship between  $\Delta p$  and  
22 H<sup>+</sup> leak in isolated mitochondria, particularly when the mitochondrial membrane is hyperpolarized  
23 (Brown & Brand, 1986; Nicholls, 1974). Increasing succinate flux in this system increases the polarity  
24 of the mitochondrial membrane, and consequently, H<sup>+</sup> leak. This H<sup>+</sup> leak was suggested to result from  
25  $\Delta p$ -dependent dielectric breakdown of the mitochondrial membrane (Nicholls, 1974). This mechanism  
26 of action for succinate is difficult to test conclusively in tissue. Follow-up investigations of our findings  
27 should focus on understanding the molecular and biophysical mechanism of succinate-induced  
28 uncoupling.

29  
30 While succinate-induced mitochondrial uncoupling is possible in intact tissue *ex vivo* (**Figure 5**) or *in*  
31 *vitro* (Mills et al., 2018), we have yet to conclusively show that it occurs *in vivo*. The concentration of  
32 circulating succinate reaches up to 150  $\mu$ M with obesity and 200  $\mu$ M with type-2-diabetes (Serena et  
33 al., 2018), 150  $\mu$ M during exercise in humans (Hochachka & Dressendorfer, 1976), and in excess of  
34 300  $\mu$ M when seals are forced to dive and become hypoxic (Hochachka et al., 1975). Most tissues  
35 are therefore not normally exposed to the millimolar [succinate] that elicit the most substantial effects  
36 on OCR, yet even lower [succinate] are able to stimulate oligomycin-resistant uncoupled respiration.  
37 The volume of subretinal space between RPE and photoreceptors is small [cite]. Succinate release  
38 from the retina (Bisbach et al., 2020), may populate the subretinal space with a [succinate] sufficient  
39 to stimulate mitochondrial uncoupling in eyecup tissue under physiological conditions. To determine if  
40 this occurs *in vivo* we will need to develop methods that can measure succinate concentrations within  
41 the tightly confined subretinal space.

### 42 **Acknowledgements**

- 43 • DH: T32 EY007031/EY/NEI NIH HHS/United States
- 44 • CB: F31 EY031165/EY/NEI NIH HHS/United States
- 45 • JBH: R01 EY006641/EY/NEI NIH HHS/United States
- 46 • JBH: R01 EY017863/EY/NEI NIH HHS/United States
- 47 • P30 DK017047/DK/NIDDK NIH HHS/United States (OCR studie and conscious jugular infusion studies were performed at  
48 the Cell Function Analysis Core of the Univ. of Washington's Diabetes Research Center, which is supported by NIH grant  
49 no....)
- 50

## Author Contributions

DTH, CB, and JH conceived of the project, which was supervised by JBH. DTH, BMR, CB, EG, and TM performed the experiments. BMR, EG, TM, MS, and IRS provided critical methodological support. DTH and BMR analyzed the experiments. JBH and IRS provided reagents. DTH, CB, and JBH secured the funding. DTH wrote the original draft of the manuscript, which was reviewed and edited by all authors.

## Declaration Of Interests

The authors declare no competing interests.

## References

- Andrienko, T. N., Pasdois, P., Pereira, G. C., Ovens, M. J., & Halestrap, A. P. (2017). The role of succinate and ROS in reperfusion injury - A critical appraisal. *J Mol Cell Cardiol*, *110*, 1-14. <https://doi.org/10.1016/j.yjmcc.2017.06.016>
- Ayala J. E., Bracy D. P., Malabanan C., Freyja D. James F. D., Ansari T., Fueger P. T., McGuinness O. P., Wasserman D. H. (2011) Hyperinsulinemic-euglycemic clamps in conscious, unrestrained mice, *J Vis Exp*, (57): 3188, doi:10.3791/3188
- Bertholet, A. M., Chouchani, E. T., Kazak, L., Angelin, A., Fedorenko, A., Long, J. Z., Vidoni, S., Garrity, R., Cho, J., Terada, N., Wallace, D. C., Spiegelman, B. M., & Kirichok, Y. (2019). H. *Nature*, *571*(7766), 515-520. <https://doi.org/10.1038/s41586-019-1400-3>
- Bisbach, C. M., Hass, D. T., Robbins, B. M., Rountree, A. M., Sadilek, M., Sweet, I. R., & Hurley, J. B. (2020). Succinate Can Shuttle Reducing Power from the Hypoxic Retina to the O2 Rich Pigment Epithelium. *Cell Rep*, *31*(5), 107606. <https://doi.org/10.1016/j.celrep.2020.107606>
- Brown, G. C., & Brand, M. D. (1986). Changes in permeability to protons and other cations at high proton motive force in rat liver mitochondria. *Biochem J*, *234*(1), 75-81. <https://doi.org/10.1042/bj2340075>
- Du, J., Linton, J. D., & Hurley, J. B. (2015). Probing Metabolism in the Intact Retina Using Stable Isotope Tracers. *Methods Enzymol*, *561*, 149-170. <https://doi.org/10.1016/bs.mie.2015.04.002>
- Ehinger, J. K., Piel, S., Ford, R., Karlsson, M., Sjövall, F., Frostner, E., Morota, S., Taylor, R. W., Turnbull, D. M., Cornell, C., Moss, S. J., Metzsch, C., Hansson, M. J., Fliri, H., & Elmér, E. (2016). Cell-permeable succinate prodrugs bypass mitochondrial complex I deficiency. *Nat Commun*, *7*, 12317. <https://doi.org/10.1038/ncomms12317>
- Furchgott, R. F., & Shorr, E. (1948). The effect of succinate on respiration and certain metabolic processes of mammalian tissues at low oxygen tensions in vitro. *J Biol Chem*, *175*(1), 201-215.
- Geubelle, P., Gilissen, J., Dilly, S., Poma, L., Dupuis, N., Laschet, C., Abboud, D., Inoue, A., Jouret, F., Pirotte, B., & Hanson, J. (2017). Identification and pharmacological characterization of succinate receptor agonists. *Br J Pharmacol*, *174*(9), 796-808. <https://doi.org/10.1111/bph.13738>
- Gutiérrez-Aguilar, M., & Baines, C. P. (2013). Physiological and pathological roles of mitochondrial SLC25 carriers. *Biochem J*, *454*(3), 371-386. <https://doi.org/10.1042/BJ20121753>
- Hanu, R., McKenna, M., O'Neill, A., Resneck, W. G., & Bloch, R. J. (2000). Monocarboxylic acid transporters, MCT1 and MCT2, in cortical astrocytes in vitro and in vivo. *Am J Physiol Cell Physiol*, *278*(5), C921-930. <https://doi.org/10.1152/ajpcell.2000.278.5.C921>
- Hochachka, P. W., & Dressendorfer, R. H. (1976). Succinate accumulation in man during exercise. *Eur J Appl Physiol Occup Physiol*, *35*(4), 235-242. <https://doi.org/10.1007/BF00423282>
- Hochachka, P. W., Owen, T. G., Allen, J. F., & Whittow, G. C. (1975). Multiple end products of anaerobiosis in diving vertebrates. *Comp Biochem Physiol B*, *50*(1), 17-22. [https://doi.org/10.1016/0305-0491\(75\)90292-8](https://doi.org/10.1016/0305-0491(75)90292-8)
- Jang, C., Hui, S., Zeng, X., Cowan, A. J., Wang, L., Chen, L., Morscher, R. J., Reyes, J., Frezza, C., Hwang, H. Y., Imai, A., Saito, Y., Okamoto, K., Vaspoli, C., Kasprinski, L., Zsido, G. A., Gorman, J. H.,



- 02 Gorman, R. C., & Rabinowitz, J. D. (2019). Metabolite Exchange between Mammalian Organs  
03 Quantified in Pigs. *Cell Metab*, 30(3), 594-606.e593. <https://doi.org/10.1016/j.cmet.2019.06.002>
- 04 Kaufhold, M., Schulz, K., Breljak, D., Gupta, S., Henjakovic, M., Krick, W., Hagos, Y., Sabolic, I., Burckhardt, B.  
05 C., & Burckhardt, G. (2011). Differential interaction of dicarboxylates with human sodium-dicarboxylate  
06 cotransporter 3 and organic anion transporters 1 and 3. *Am J Physiol Renal Physiol*, 301(5), F1026-  
07 1034. <https://doi.org/10.1152/ajprenal.00169.2011>
- 08 MacDonald, M. J., Fahien, L. A., Mertz, R. J., & Rana, R. S. (1989). Effect of esters of succinic acid and other  
09 citric acid cycle intermediates on insulin release and inositol phosphate formation by pancreatic islets.  
10 *Arch Biochem Biophys*, 269(2), 400-406. [https://doi.org/10.1016/0003-9861\(89\)90123-9](https://doi.org/10.1016/0003-9861(89)90123-9)
- 11 Millard, P., Delépine, B., Guionnet, M., Heuillet, M., Bellvert, F., & Létisse, F. (2019). IsoCor: isotope correction  
12 for high-resolution MS labeling experiments. *Bioinformatics*, 35(21), 4484-4487.  
13 <https://doi.org/10.1093/bioinformatics/btz209>
- 14 Mills, E. L., Pierce, K. A., Jedrychowski, M. P., Garrity, R., Winther, S., Vidoni, S., Yoneshiro, T., Spinelli, J. B.,  
15 Lu, G. Z., Kazak, L., Banks, A. S., Haigis, M. C., Kajimura, S., Murphy, M. P., Gygi, S. P., Clish, C. B.,  
16 & Chouchani, E. T. (2018). Accumulation of succinate controls activation of adipose tissue  
17 thermogenesis. *Nature*, 560(7716), 102-106. <https://doi.org/10.1038/s41586-018-0353-2>
- 18 Nakai, M., Chen, L., & Nowak, R. A. (2006). Tissue distribution of basigin and monocarboxylate transporter 1 in  
19 the adult male mouse: a study using the wild-type and basigin gene knockout mice. *Anat Rec A Discov*  
20 *Mol Cell Evol Biol*, 288(5), 527-535. <https://doi.org/10.1002/ar.a.20320>
- 21 Neal A., Roundtree, A. M., Philips, C. W. Kavanagh, T. J., Williams D. P., Newham, P., Khalil G., Cook, D. L.,  
22 Sweet, I. R. (2015). Quantification of Low-Level Drug Effects Using Real-Time, *in vitro* Measurement of  
23 Oxygen Consumption Rate. *Toxicol Sci*, 148(2), 594-602. <https://doi.org/10.1093/toxsci/kfv208>
- 24 Nicholls, D. G. (1974). The influence of respiration and ATP hydrolysis on the proton-electrochemical gradient  
25 across the inner membrane of rat-liver mitochondria as determined by ion distribution. *Eur J Biochem*,  
26 50(1), 305-315. <https://doi.org/10.1111/j.1432-1033.1974.tb03899.x>
- 27 Pajor, A. M. (2014). Sodium-coupled dicarboxylate and citrate transporters from the SLC13 family. *Pflugers*  
28 *Arch*, 466(1), 119-130. <https://doi.org/10.1007/s00424-013-1369-y>
- 29 Parilla, J. H., Willard, J. R., Barrow, B. M., & Zraika, S. (2018). A Mouse Model of Beta-Cell Dysfunction as  
30 Seen in Human Type 2 Diabetes. *J Diabetes Res*, 2018, 6106051.  
31 <https://doi.org/10.1155/2018/6106051>
- 32 Prag, H. A., Gruszczuk, A. V., Huang, M. M., Beach, T. E., Young, T., Tronci, L., Nikitopoulou, E., Mulvey, J.  
33 F., Ascione, R., Hadjihambi, A., Shattock, M. J., Pellerin, L., Saeb-Parsy, K., Frezza, C., James, A. M.,  
34 Krieg, T., Murphy, M. P., & Aksentijević, D. (2020). Mechanism of succinate efflux upon reperfusion of  
35 the ischemic heart. *Cardiovasc Res*. <https://doi.org/10.1093/cvr/cvaa148>
- 36 Reddy, A., Bozi, L. H. M., Yaghi, O. K., Mills, E. L., Xiao, H., Nicholson, H. E., Paschini, M., Paulo, J. A.,  
37 Garrity, R., Laznik-Bogoslavski, D., Ferreira, J. C. B., Carl, C. S., Sjøberg, K. A., Wojtaszewski, J. F. P.,  
38 Jeppesen, J. F., Kiens, B., Gygi, S. P., Richter, E. A., Mathis, D., & Chouchani, E. T. (2020). pH-Gated  
39 Succinate Secretion Regulates Muscle Remodeling in Response to Exercise. *Cell*, 183(1), 62-75.e17.  
40 <https://doi.org/10.1016/j.cell.2020.08.039>
- 41 Robb, E. L., Hall, A. R., Prime, T. A., Eaton, S., Szibor, M., Viscomi, C., James, A. M., & Murphy, M. P. (2018).  
42 Control of mitochondrial superoxide production by reverse electron transport at complex I. *J Biol Chem*,  
43 293(25), 9869-9879. <https://doi.org/10.1074/jbc.RA118.003647>
- 44 Serena, C., Ceperuelo-Mallafré, V., Keiran, N., Queipo-Ortuño, M. I., Bernal, R., Gomez-Huelgas, R., Urpi-  
45 Sarda, M., Sabater, M., Pérez-Brocal, V., Andrés-Lacueva, C., Moya, A., Tinahones, F. J., Fernández-  
46 Real, J. M., Vendrell, J., & Fernández-Veledo, S. (2018). Elevated circulating levels of succinate in  
47 human obesity are linked to specific gut microbiota. *ISME J*, 12(7), 1642-1657.  
48 <https://doi.org/10.1038/s41396-018-0068-2>
- 49 Sweet, I. R., Cook, D. L., Wiseman, R. W., Greenbaum, C. J., Lernmark, A., Matsumoto, S., Teague, J. C., &  
50 Krohn, K. A. (2002). Dynamic perfusion to maintain and assess isolated pancreatic islets. *Diabetes*  
51 *Technol Ther*, 4(1), 67-76. <https://doi.org/10.1089/15209150252924111>
- 52 Walters J. M., Ward G. M., Kalfas A., Best J. D., Alford F. P. (2016) The effect of epinephrine on glucose-  
53 mediated and insulin-mediated glucose disposal in insulin-dependent diabetes. *Metabolism*, 41(6);  
54 671-677. doi: 10.1016/0026-0495(92)90062F
- 55 Wang, T., Xu, Y. Q., Yuan, Y. X., Xu, P. W., Zhang, C., Li, F., Wang, L. N., Yin, C., Zhang, L., Cai, X. C., Zhu,  
56 C. J., Xu, J. R., Liang, B. Q., Schaul, S., Xie, P. P., Yue, D., Liao, Z. R., Yu, L. L., Luo, L., Zhou, G.,

57 Yang, J. P., He, Z. H., Du, M., Zhou, Y. P., Deng, B. C., Wang, S. B., Gao, P., Zhu, X. T., Xi, Q. Y.,  
58 Zhang, Y. L., Shu, G., & Jiang, Q. Y. (2020). Succinate induces skeletal muscle fiber remodeling via  
59 SUCNR1 signaling. *EMBO Rep*, 21(5), e50461. <https://doi.org/10.15252/embr.202050461>  
60 Windeløv J. A., Pedersen J., Holst J. J. (2016) Use of anesthesia dramatically alters the oral glucose tolerance  
61 and insulin secretion in C57Bl/6 mice. *Physiol Rep*. 4(11):e12824. doi: 10.14814/phy2.12824.  
62

## 63 Figure Captions

### 64 Figure 1. Extracellular Succinate Increases Oxygen Consumption in Diverse Tissues Ex Vivo.

65 (A) Schematic of the mitochondrial electron transport chain, the main site of O<sub>2</sub> consumption in the  
66 mammalian cell. We measured O<sub>2</sub> consumption rate (OCR) in freshly dissected (C) liver (n=3), (D)  
67 kidney (n=4), (E) interscapular brown adipose (n=3), (F) cerebellum (n=3), (B,G) eyecup (n=3), and  
68 (B,H) retina (n=4) tissue from C57BL6/J mice, perfused in modified KRB buffer with 5 mM glucose as  
69 the principal metabolic fuel. We supplied this media with increasing concentrations of sodium  
70 succinate (30 μM, 100 μM, 300 μM, 1 mM, 3 mM, 10 mM, 30 mM, or 100 mM) and determined the  
71 consequent OCR. Example data from such experiments are shown in (B), with each line representing  
72 an individual sample. These data are summarized for different tissues in C-H as dots displaying mean  
73 steady-state OCR ± SEM. We estimated the dependence of OCR on [succinate] by fitting the data  
74 with an allosteric sigmoidal curve (red lines). Best-fit parameters are available in table 1. Dotted lines  
75 surrounding the curves represent 95% confidence intervals from the curve fit.  
76

### 77 Figure 2. Systemic Metabolism of Infused Succinate

78 (A-B) We infused U-<sup>13</sup>C-succinate into the mouse bloodstream and sampled blood 0.5 (n=5), 1 (n=5),  
79 2 (n=7), 3 (n=6), 4 (n=5), 5 (n=7), 7.5 (n=6), and 10 (n=6) minutes post-infusion, with catheterized,  
80 un-infused mice as a “0 minute” control (n=7). (A) We measured unlabeled (m+0) and fully <sup>13</sup>C-  
81 labeled (m+4) succinate in blood post-infusion (plotted: mean ± SEM) and fit these data with a one-  
82 phase decay function (fit line ± 95% CI) (B) Isotopic abundance of blood succinate prior to (blue) and  
83 following (purple) infusion. Represented are individual replicates (dots) and mean ± SEM (bars). (C-  
84 E) Five minutes following the infusion, blood succinate enters in to and is metabolized by retina (n=3),  
85 cerebellum (n=3), eyecup (n=3), liver (n=4), lung (n=3), BAT (n=3), WAT (n=3), and blood (n=7). (C)  
86 m+4 succinate concentration within tissues shows differential tissue entry. (D) Fractional labeling of  
87 m+4 succinate shows relative replacement of the succinate pool by labeled substrate five minutes  
88 following the infusion, and (E) <sup>13</sup>C/<sup>12</sup>C is a ratio that in each tissue represents relative extents to which  
89 the metabolites we measure (any of which could be a product of <sup>13</sup>C-succinate; table 2) are labeled  
90 by <sup>13</sup>C, relative to total <sup>13</sup>C abundance in that tissue. (F) Contains a representation of succinate’s  
91 position in the Krebs cycle and which carbons should be labeled (purple filled circles) by metabolism  
92 of infused U-<sup>13</sup>C succinate, as opposed to unlabeled carbons (purple-rimmed unfilled circles). The  
93 abundance of <sup>13</sup>C-labeled metabolites downstream of succinate (m+4 fumarate (G), m+4 malate (H),  
94 m+4 citrate (I), m+4 aspartate (J), and m+3 pyruvate (K)) relative to tissue m+4 succinate is  
95 respectively represented. Individual data points are represented in panels C-K, with a red horizontal  
96 line with error bars reporting the mean ± SEM.  
97

### 98 Figure 3. Infused Succinate Reveals Diverse Metabolic Routes in the Retina and Eyecup

99 Following bloodstream infusion of U-<sup>13</sup>C-succinate in retina and eyecup, we determined the fractional  
100 labeling (A-B, D-E, G-H, M-N) and total abundance (metabolite pool size; C, F, I, L, O) of succinate  
101 (A-C), malate (D-F), aspartate (G-I), citrate (J-L), and α-ketoglutarate (M-O) 1, 2, 3, 5, and 12  
102 minutes post-infusion. We compared these to labeling of tissue from un-infused catheterized  
103 C57BL6/J mice (“0 minutes”). M+x indicates that the molecule is <sup>13</sup>C-labeled with x carbons, all  
104 originating from infused succinate. N=3 for all time points except 12 minutes post-infusion, where  
105 n=6. All bars and dots represent mean ± SEM.  
106

07  
08 **Figure 4. Infused Succinate Is Utilized to Make Glycolytic Precursors in Retina and Eyecup**  
09 **Tissue. (A)** We determined m+3 phosphoenolpyruvate / m+4 succinate in our tissue panel 5 minutes  
10 following infusion, displaying data as in Figure 2G-K, **(B)** Schematic of the metabolic route by which  
11 <sup>13</sup>C-succinate is most likely able to label glycolytic intermediates. **(C-K)** We performed the same  
12 analysis as in Figure 3 on pyruvate **(C-E)**, phosphoenolpyruvate (PEP; **F-H**), and 3-phosphoglycerate  
13 (3-PG; **I-K**). N=3 for all time points except 12 minutes post-infusion, where n=6. All bars and dots  
14 represent mean ± SEM.

15  
16 **Figure 5. Extracellular Succinate Uncouples Eyecup Mitochondria Ex Vivo**

17 **(A)** Ex vivo eyecup OCR as a function of substrate concentration in eyecups respiring using 5 mM  
18 glucose supplemented with increasing concentrations (30 μM, 100 μM, 300 μM, 1 mM, 3 mM, 10 mM)  
19 of succinate or equimolar malate and pyruvate. **(B)** We estimated mitochondrial H<sup>+</sup> flux from the  
20 matrix to the intermembrane space by multiplying OCR by the H<sup>+</sup>/O<sub>2</sub> ratio [cite] for the  
21 pyruvate/malate-linked substrate NADH (10) or succinate (6). The disagreement in substrate-  
22 dependent H<sup>+</sup> flux between these curves suggests that additional H<sup>+</sup> flux in the succinate treatment is  
23 used to counter an additional H<sup>+</sup> conductance from the intermembrane space, suggesting that with  
24 succinate there is an H<sup>+</sup> conductance that is not from ATP-synthase activity. **(C)** We determined ATP-  
25 synthase-immune succinate or pyruvate/malate oxidation by incubating eyecup tissue first in 5 mM  
26 glucose, next in 5 mM glucose with 10 μM of the ATP-synthase inhibitor oligomycin A, and finally in a  
27 mix of 5 mM glucose, 10 μM oligomycin, and 5 mM of either succinate (black) or pyruvate/malate  
28 (blue). **(D)** Succinate exhibited substantial oligomycin-resistant respiration, and we determined how  
29 much respiration is oligomycin-immune as a function of [succinate], comparing this data to Figure 1G,  
30 converted to OCR per tissue unit rather than per unit mass. **(E-I)** To determine the source of this  
31 oligomycin-resistant respiration, we performed the experimental treatments described in (C), but  
32 following the addition of 5 mM succinate to increase respiration we attempted to shut down this  
33 increase by adding **(F)** the antioxidants mito-tempo (purple line) or N-acetyl cysteine (black line), the  
34 adenine nucleotide translocator inhibitor carboxyatractyloside (CATR), **(G)** the mitochondrial  
35 permeability transition pore complex inhibitor cyclosporine A (CsA), **(H)** the mitochondrial complex I  
36 inhibitor rotenone, **(I)** or by removing glucose then adding rotenone. Lines represent mean O<sub>2</sub>  
37 consumption rate following subtraction of the 5 mM glucose “baseline” **(A,B,D)** or the 3 mM KCN  
38 “floor” **(C,E-I)**.

39  
40 **Table 1. Best-Fit Kinetic Parameters for ex vivo Succinate oxidation**

41 Least squares fit, Parameters are represented as [mean (95% Confidence Interval)]

| Tissue     | V <sub>max</sub> (nmol O <sub>2</sub> / mg / min) | K <sub>1/2</sub> ([succinate]) | H*                | R <sup>2</sup> | n |
|------------|---------------------------------------------------|--------------------------------|-------------------|----------------|---|
| Retina     | 0.35 (?**)                                        | 11.14 (0.4-?**) )              | 0.4025 (0.14-1.2) | 0.56           | 4 |
| Cerebellum | 0.36 (0.31-0.42)                                  | 2.72 (1.67-4.94)               | 1.38 (0.81-0.73)  | 0.90           | 3 |
| Eyecup     | 0.41 (0.36-0.48)                                  | 2.22 (1.49-3.92)               | 1.10 (0.69-1.90)  | 0.95           | 3 |
| Liver      | 0.89 (0.77-1.04)                                  | 0.90 (0.49-1.75)               | 1.40 (0.72-?**) ) | 0.85           | 3 |
| BAT        | 0.57 (0.51-0.66)                                  | 1.45 (0.9-2.58)                | 1.15 (0.72-2.04)  | 0.91           | 3 |
| Kidney     | 0.66 (0.52-1.20)                                  | 1.50 (0.84-8.53)               | 1.21 (0.64-2.35)  | 0.88           | 4 |

42 \* Hill's Slope

43 \*\* "?" indicates that the curve fit is unable to estimate this parameter

44  
45 **Table 2. Metabolites used to determine total <sup>13</sup>C labeling**

| Metabolic process | Metabolite Name            | # carbons |
|-------------------|----------------------------|-----------|
| Glycolysis        | Dihydroxyacetone phosphate | 3         |
| Glycolysis        | 3-phosphoglycerate         | 3         |
| Glycolysis        | Phosphoenolpyruvate        | 3         |

|                            |                         |   |
|----------------------------|-------------------------|---|
| Glycolysis                 | Pyruvate                | 3 |
| Krebs Cycle                | Citrate                 | 6 |
| Krebs Cycle                | Isocitrate              | 6 |
| Krebs Cycle                | $\alpha$ -ketoglutarate | 5 |
| Krebs Cycle                | fumarate                | 4 |
| Krebs Cycle                | malate                  | 4 |
| Krebs Cycle (anapleurotic) | aspartate               | 4 |
| Krebs Cycle (anapleurotic) | glutamate               | 5 |

46 \*Although we routinely measure succinate, it was not included on this table because  $^{13}\text{C}$  labeling on  
47 succinate could be indicative of residual infusate in the cytosol or blood-vessels.



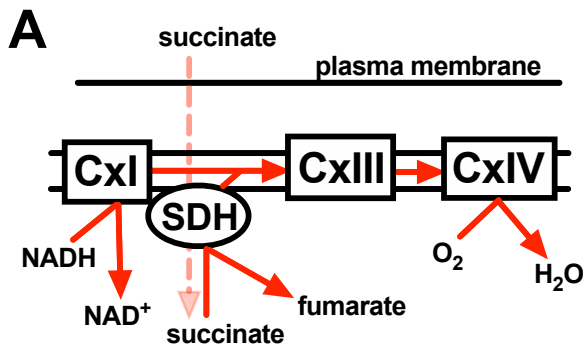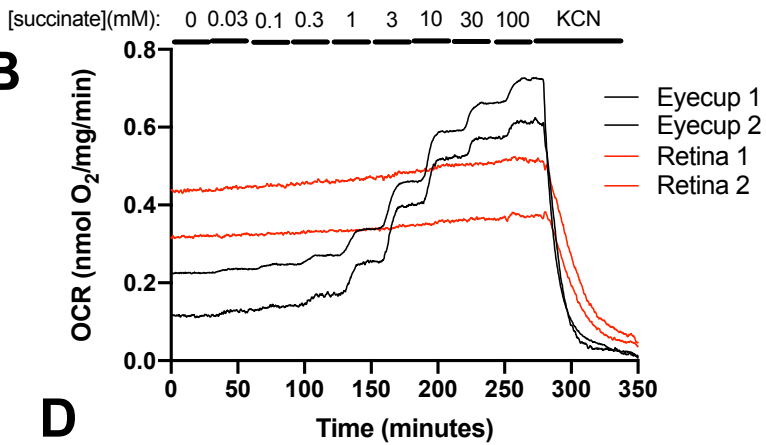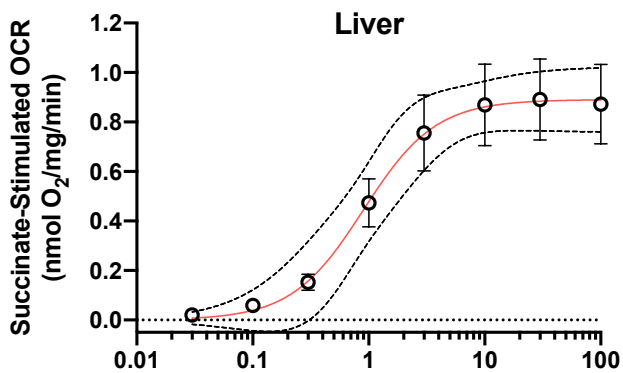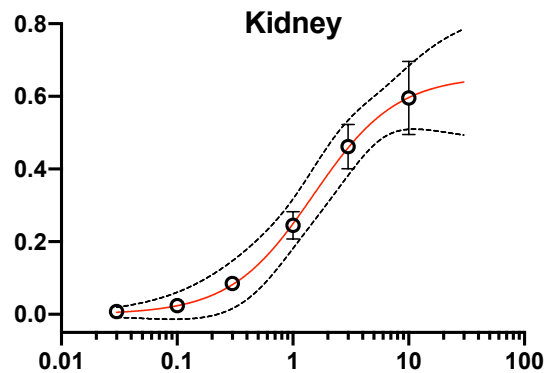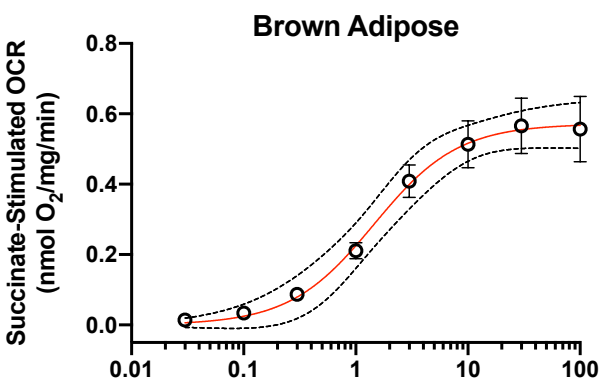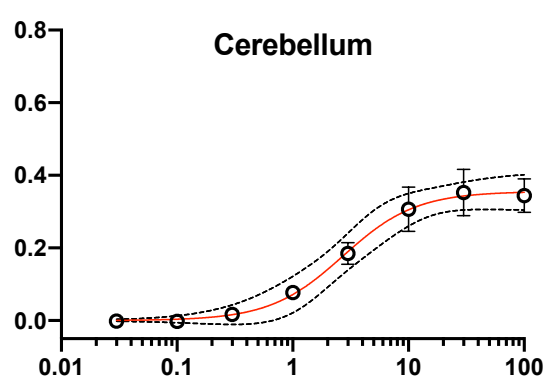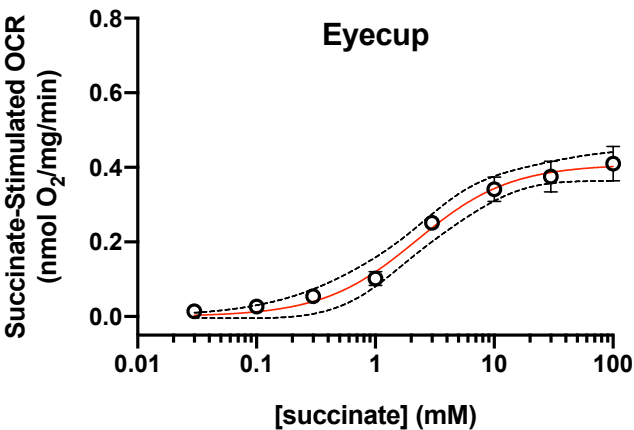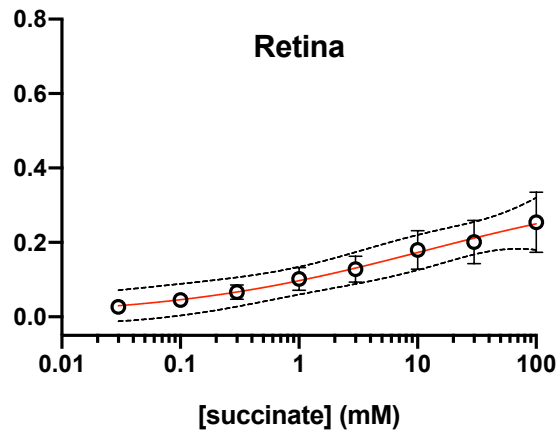

# Blood - Succinate

**A**
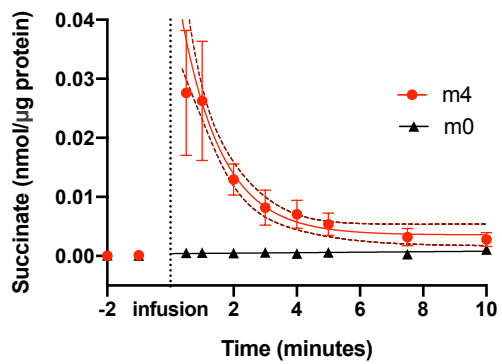
**B**
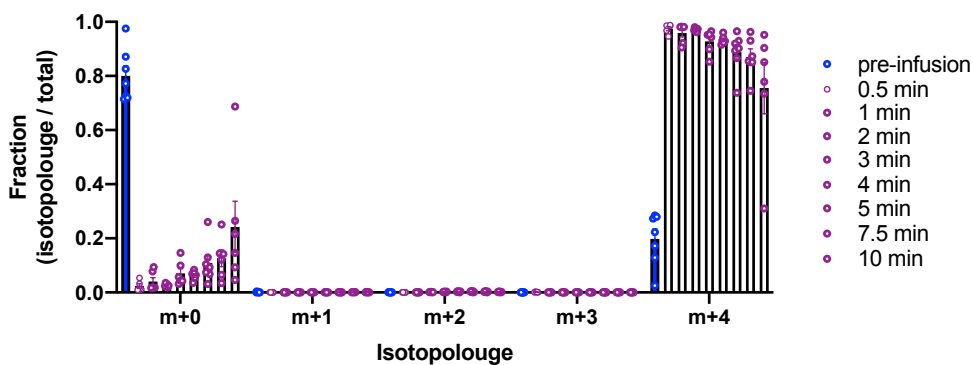

# Tissue - Succinate Flux

**C**
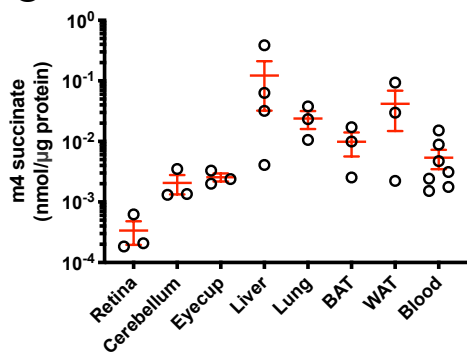
**D**
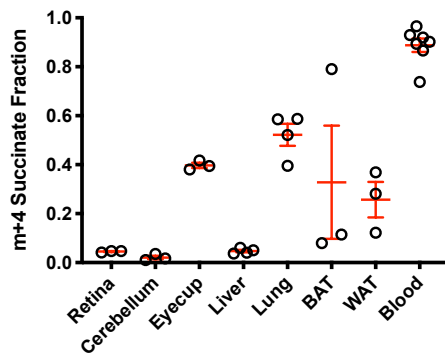
**E**
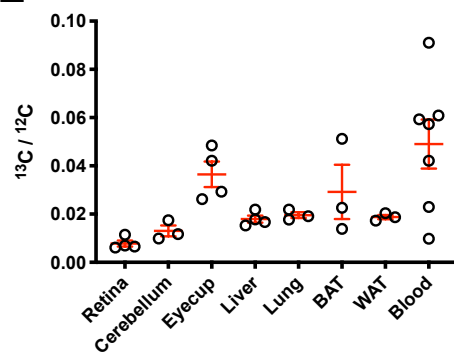

# Tissue - Downstream Intermediates

**F**
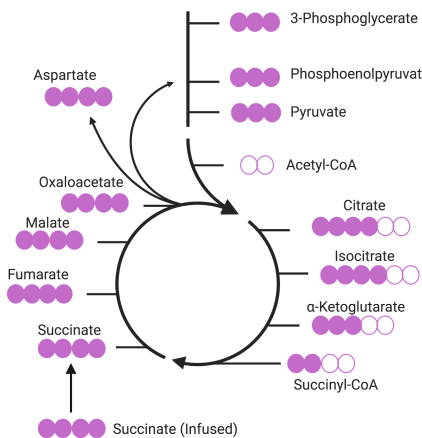
**G**
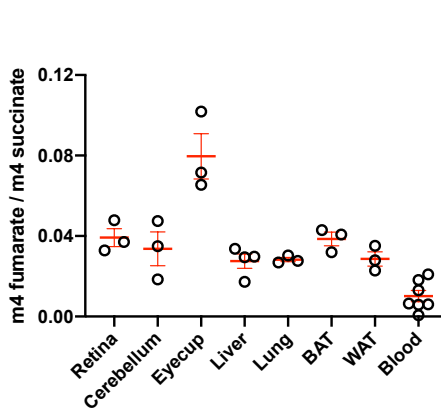
**H**
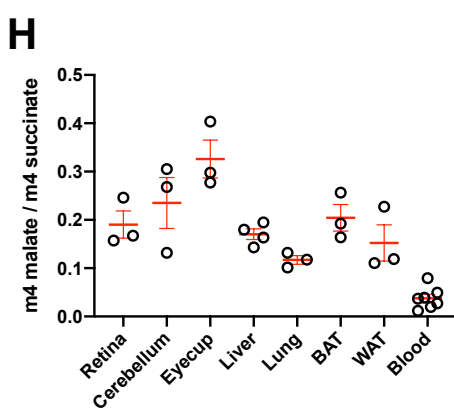
**I**
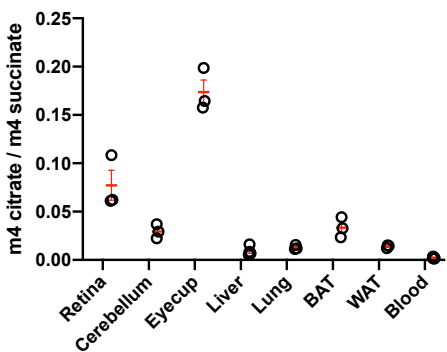
**J**
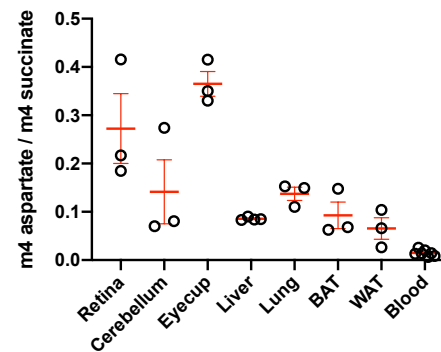
**K**
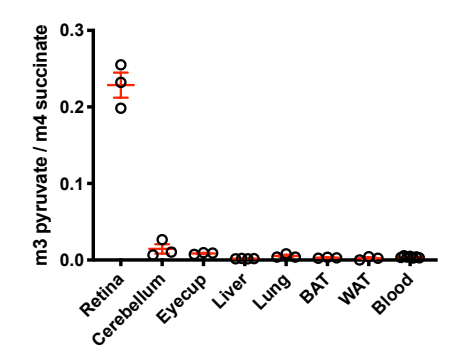

# Eye cup

# Retina

# Pool

**A**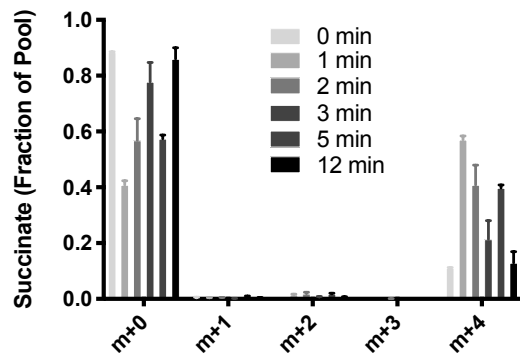**B**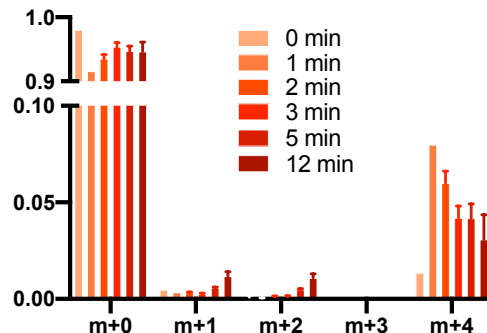**C**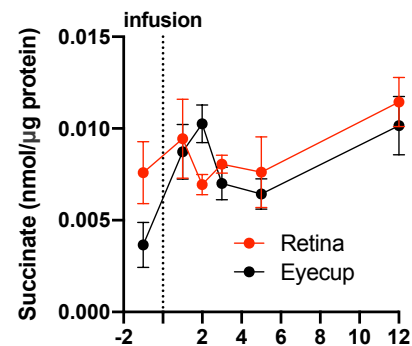**D**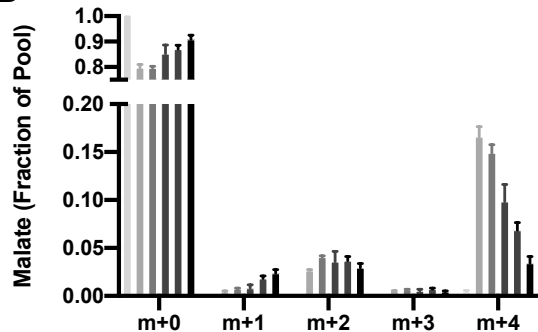**E**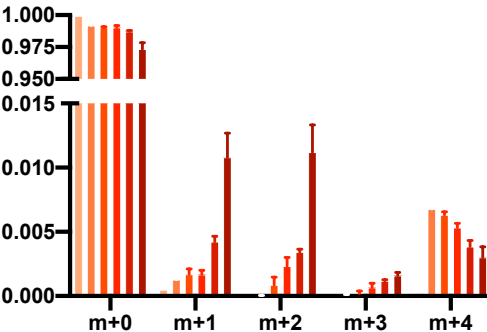**F**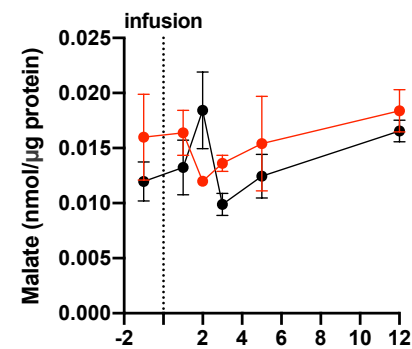**G**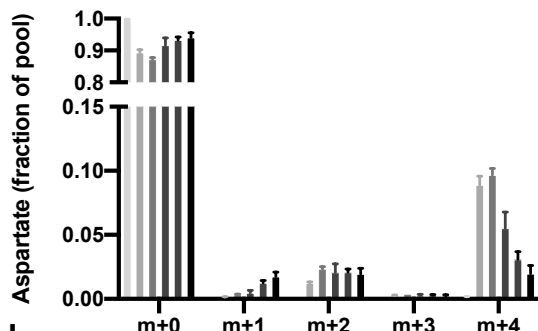**H**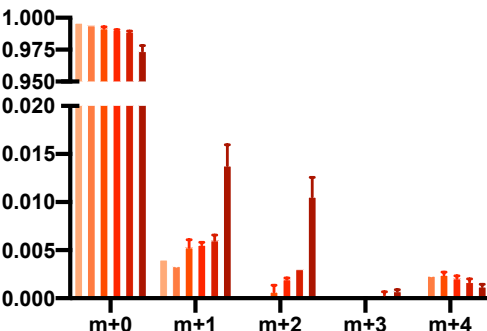**I**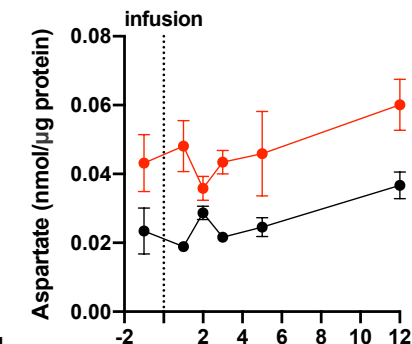**J**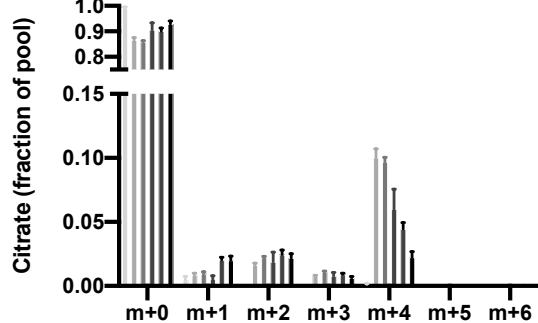**K**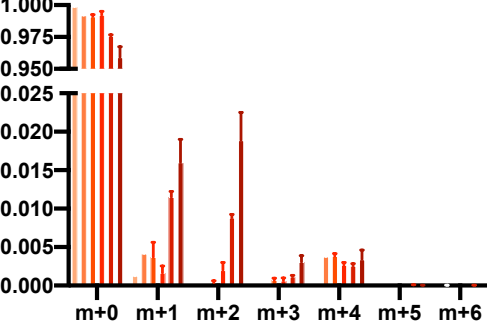**L**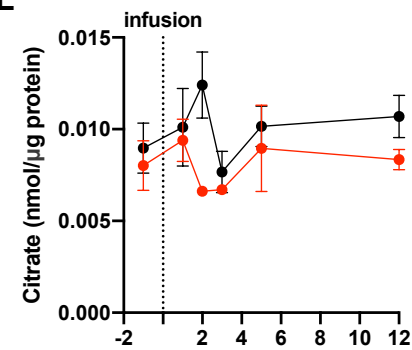**M**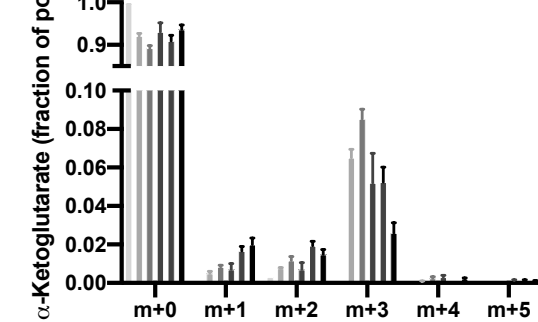**N**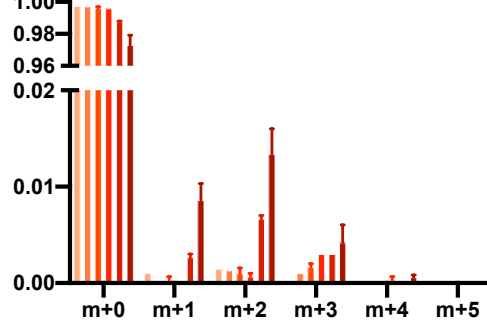**O**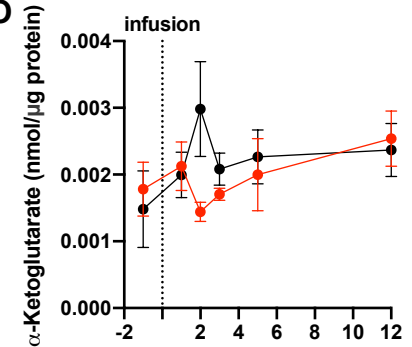

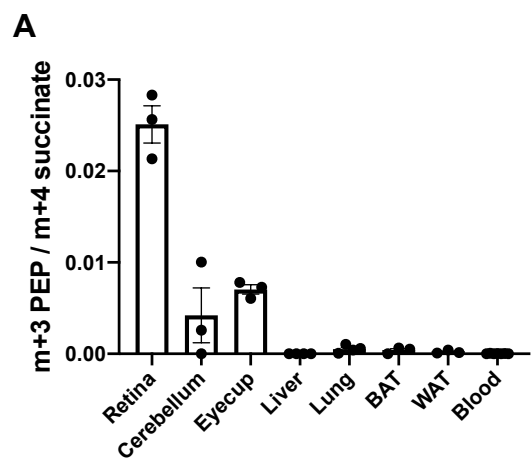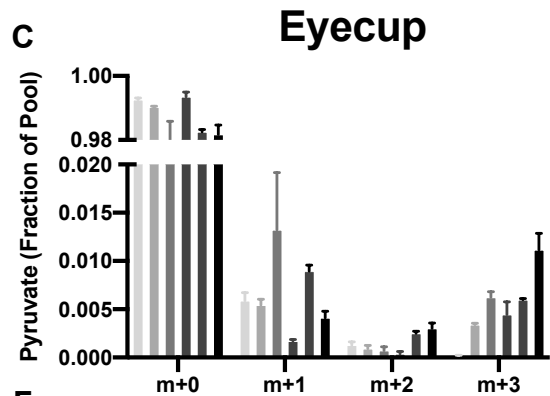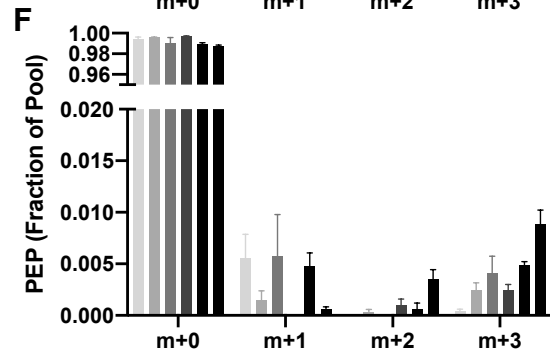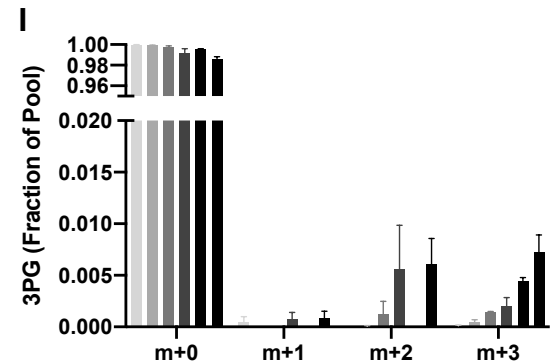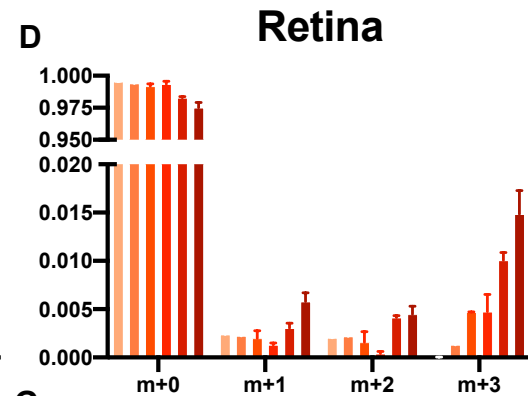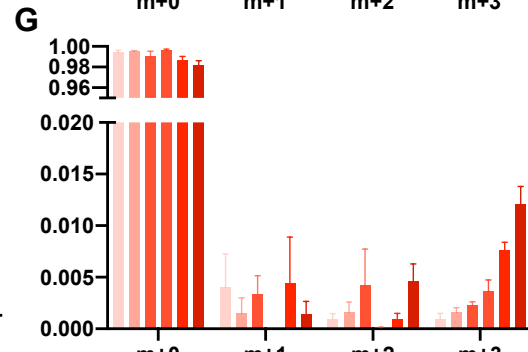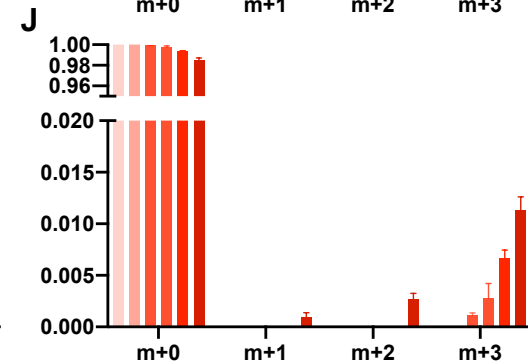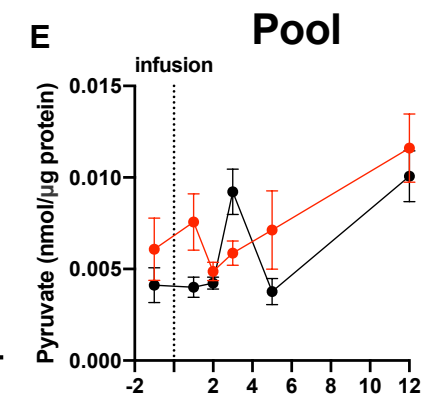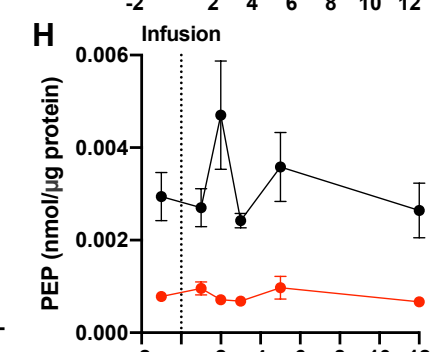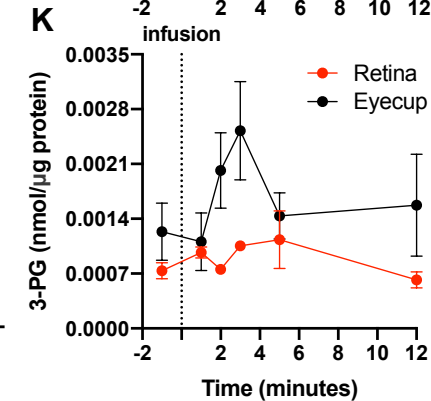



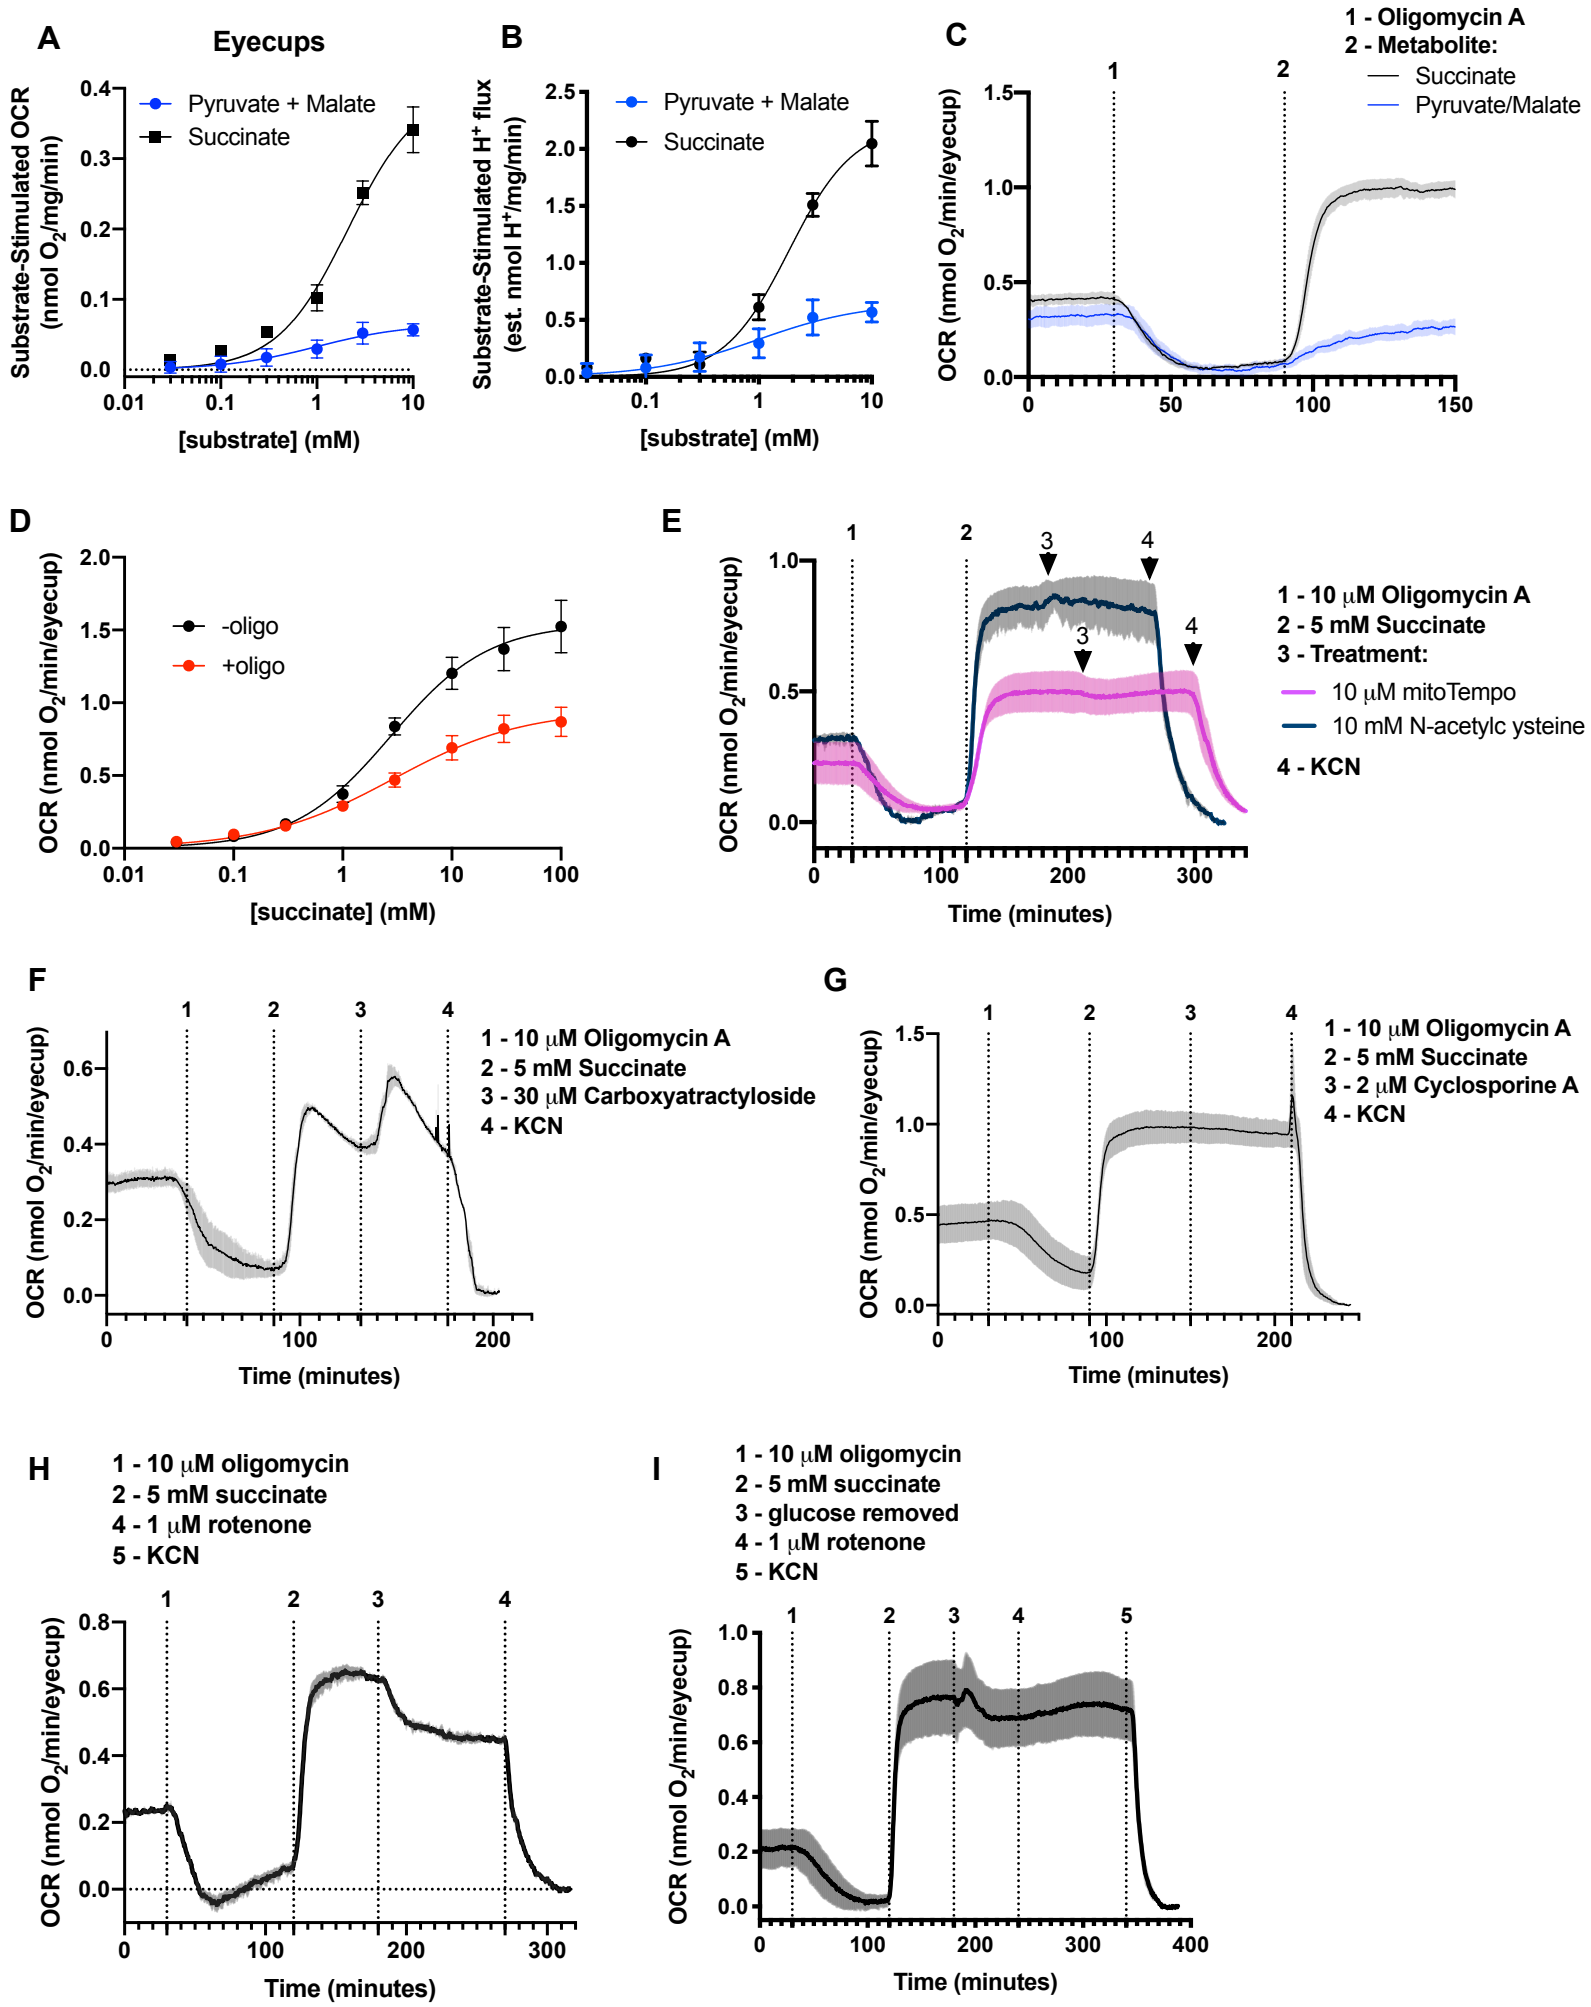

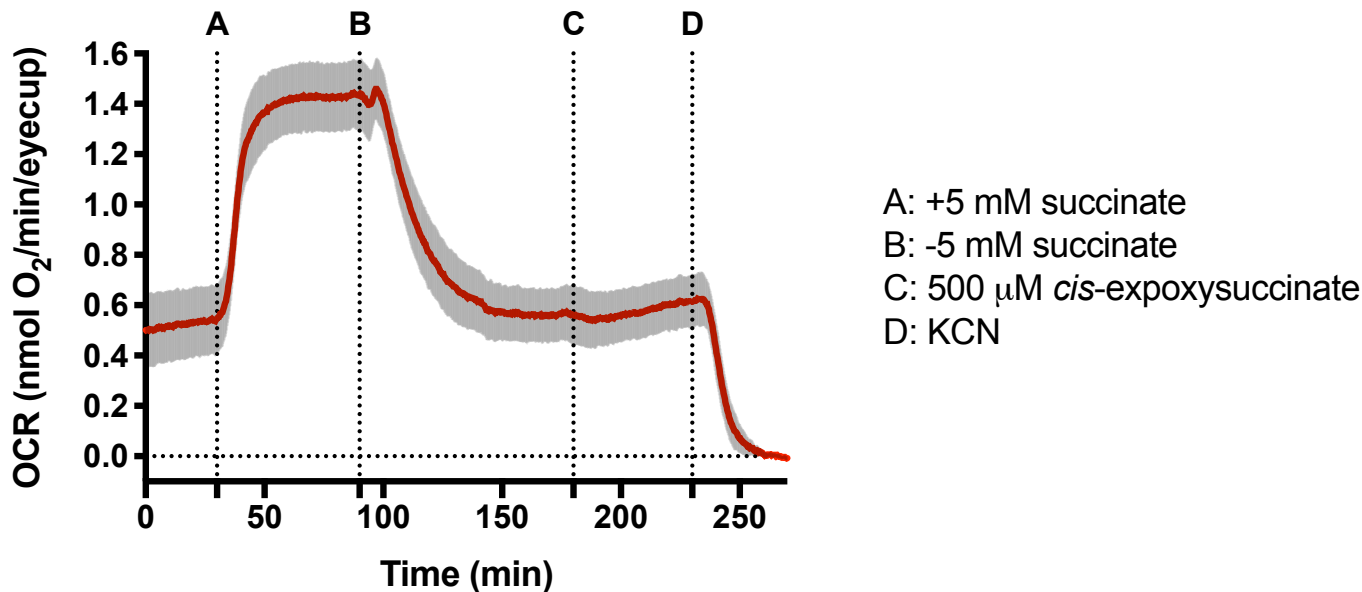

**Figure S1. SUCNR1 Agonism is insufficient to increase oxygen consumption.** Eyecup tissue was dissected from C57BL6J mice and ex vivo oxygen consumption rate (OCR, mean±SEM) measured as described in the materials and methods section. At baseline (0-30 minutes) the only source of energy to eyecups to fuel OCR was 5 mM glucose. At time=30 (A) minutes 5 mM succinate was added, which increased OCR ~3-fold. Succinate was withdrawn (B) and OCR fell to control values. *Cis*-epoxysuccinate is a SUCNR1 agonist with 10x greater potency for the GPCR than succinate (Geubelle et al., 2017). (C) We added 500 μM *cis*-epoxysuccinate to the 5 mM glucose treatment to determine whether any increases in OCR were due to metabolic changes transduced by SUCNR1. (D) KCN was used to inhibit mitochondrial complex IV OCR activity to confirm that the OCR observed in this experiment was primarily mitochondrial. We did not find any immediate effects of SUCNR1 agonism on OCR that were comparable to those of succinate itself, suggesting that succinate-induced OCR occurs mainly through direct succinate oxidation and not downstream protein signaling. (n=4)

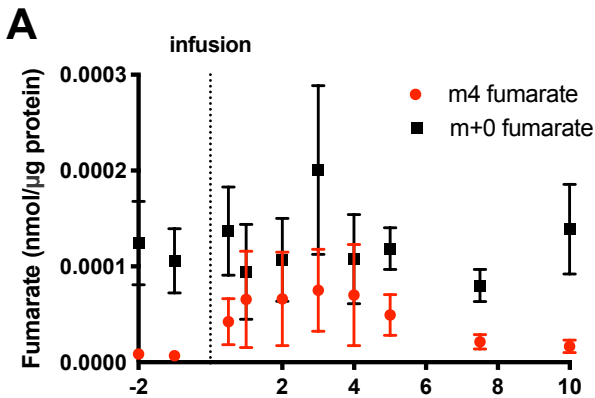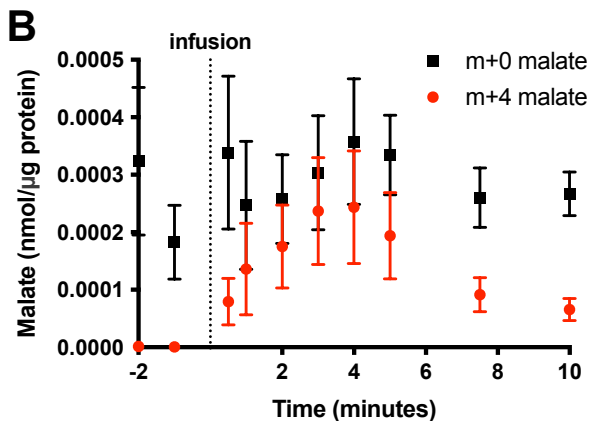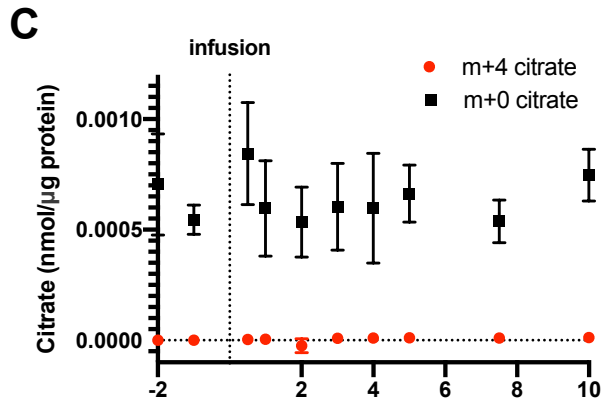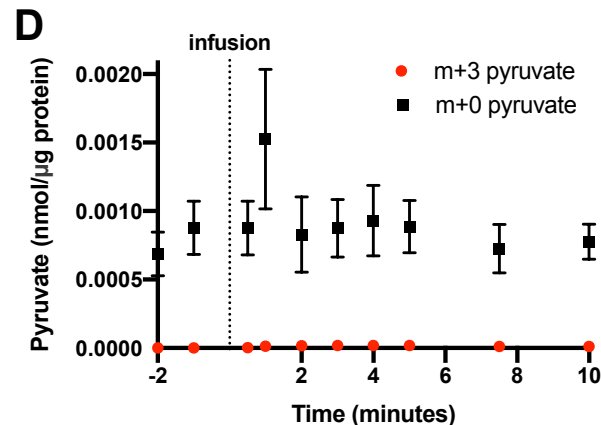

**Figure S2. Post-Infusion blood Metabolite Labeling.** U-<sup>13</sup>C-succinate was infused into blood through a venous catheter and 10  $\mu$ L blood samples were drawn at 0.5, 1, 2, 3, 4, 5, 7.5, and 10 minutes post-infusion. Analysis of blood samples shows that following the infusion, succinate does turn over in whole blood to become (A) m+4 fumarate and (B) m+4 malate, while downstream (C) m+4 citrate and upstream (D) m+3 pyruvate appear relatively unperturbed, though this occurs to a far lesser extent than m+4 succinate turnover in blood, suggesting that rather than blood succinate feeding blood fumarate or malate pools, it is taken up into tissues. The formation of m+4 intermediates in blood does not appear to perturb the m+0 pools of unlabeled metabolic intermediates also in blood. (n=5-7)

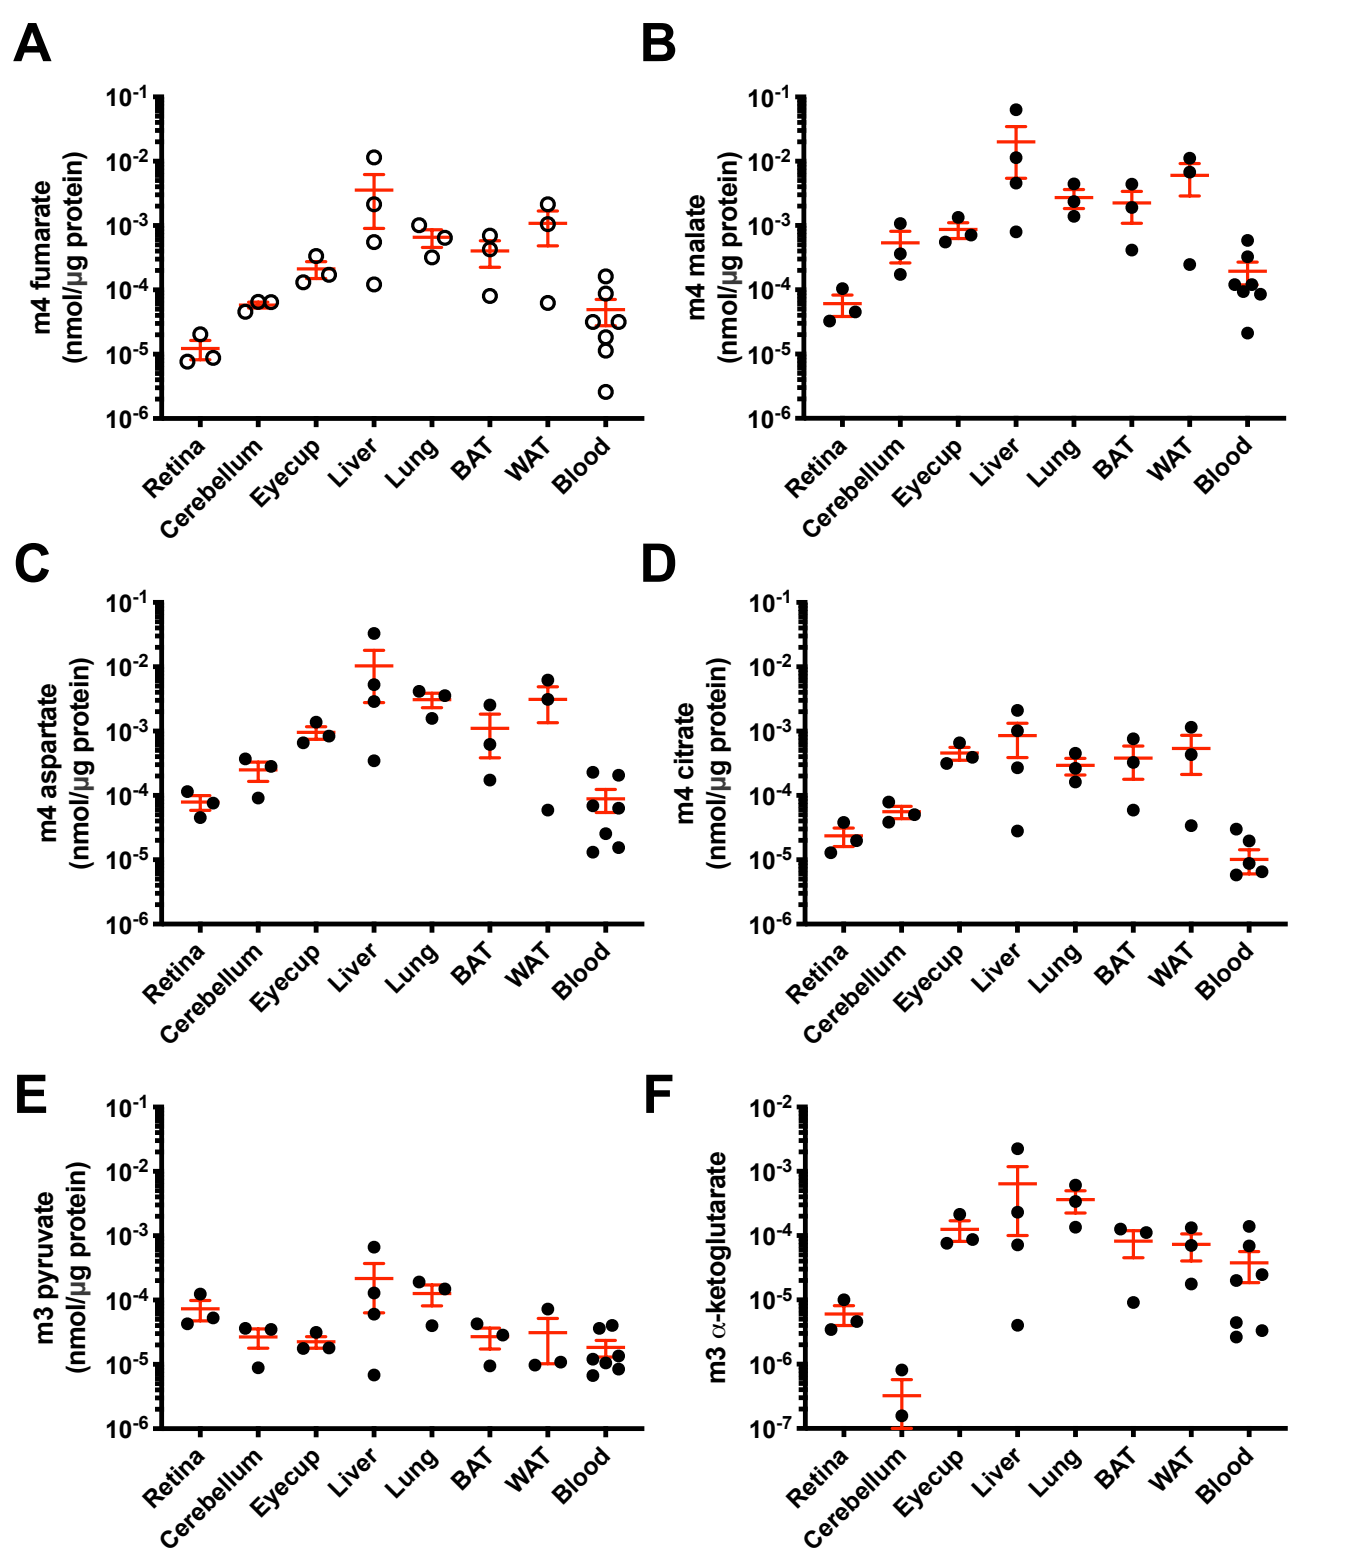

**Figure S3. Abundance of labeled TCA cycle intermediates in various tissues 5 minutes following bloodstream succinate infusion.** (A) m+4 fumarate, (B) m+4 malate, (C) m+4 aspartate, (D) m+4 citrate, (E) m+3 pyruvate, (F) and m+3  $\alpha$ -Ketoglutarate in retina, cerebellum, eyecup, liver, lung, BAT, WAT, and blood tissue. The labeling patterns of most downstream metabolic intermediates are subject to the amount of m+4 succinate imported into that tissue and thus the relative abundances of m+4 labeled metabolites closely matches that of m+4 succinate in tissues (n=3-4).

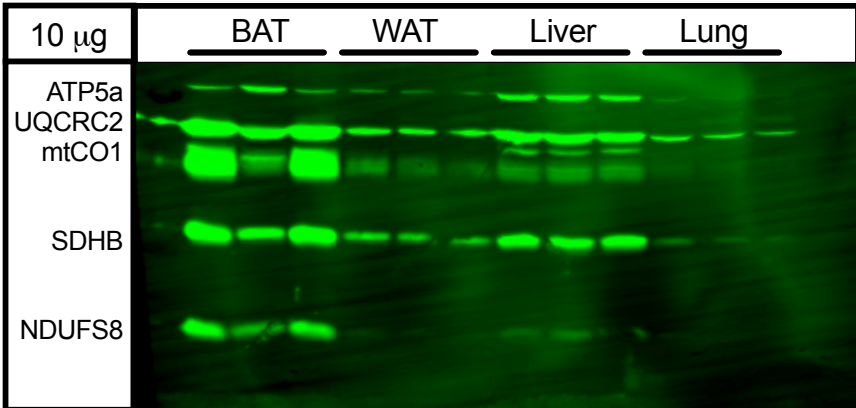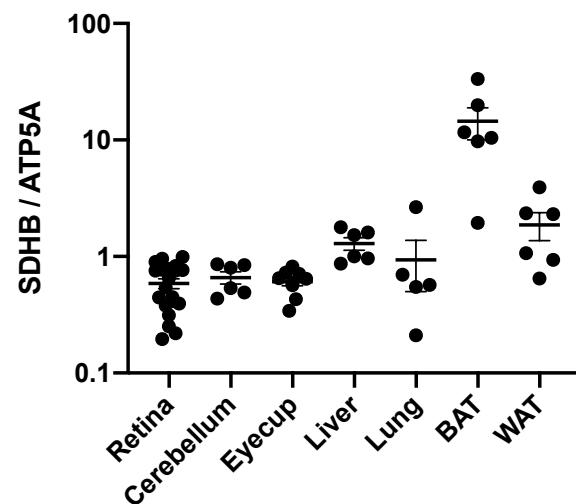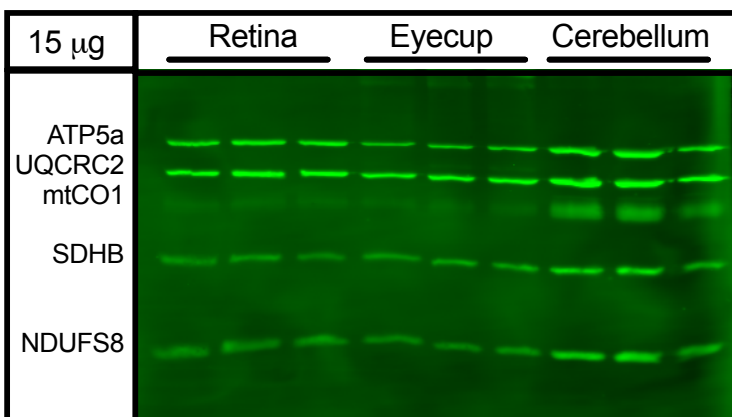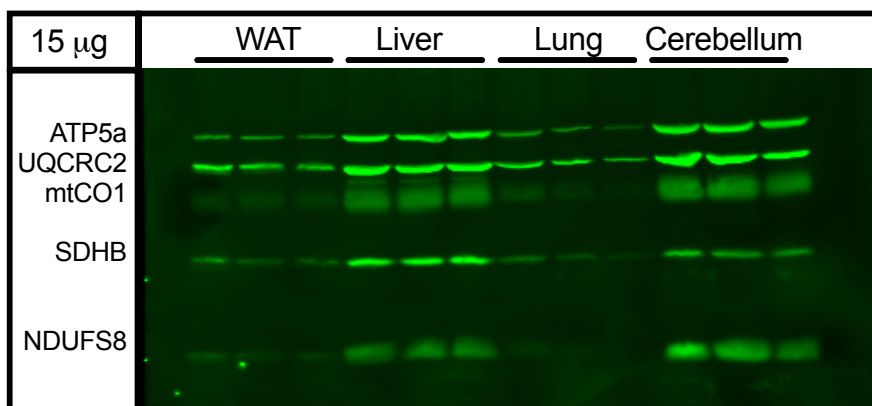

**Figure S4. Mouse Succinate Dehydrogenase subunit B (SDHB) expression in a Panel of Tissues.**

Indicated tissues were dissected from young (~8 week old) C57BL6/J mice and lysed in RIPA buffer by sonication. Indicated protein amounts (top left corner of each blot) were loaded into and run on a 13% polyacrylamide gel, and transferred to a PVDF membrane prior to blocking and immunolabeling using a mouse anti-Total OXPHOS antibody (abcam, ab110413, diluted 1:1000). To determine mitochondrial SDHB levels, we normalized SDHB levels to those of the ATP synthase subunit ATP5a and plotted normalized SDHB/ATP5a values for retina, cerebellum, eyecup, liver, lung, BAT, and WAT obtained across multiple blots. Mean  $\pm$  SEM, n=5-20, 1 outlying lung sample was excluded from this data.



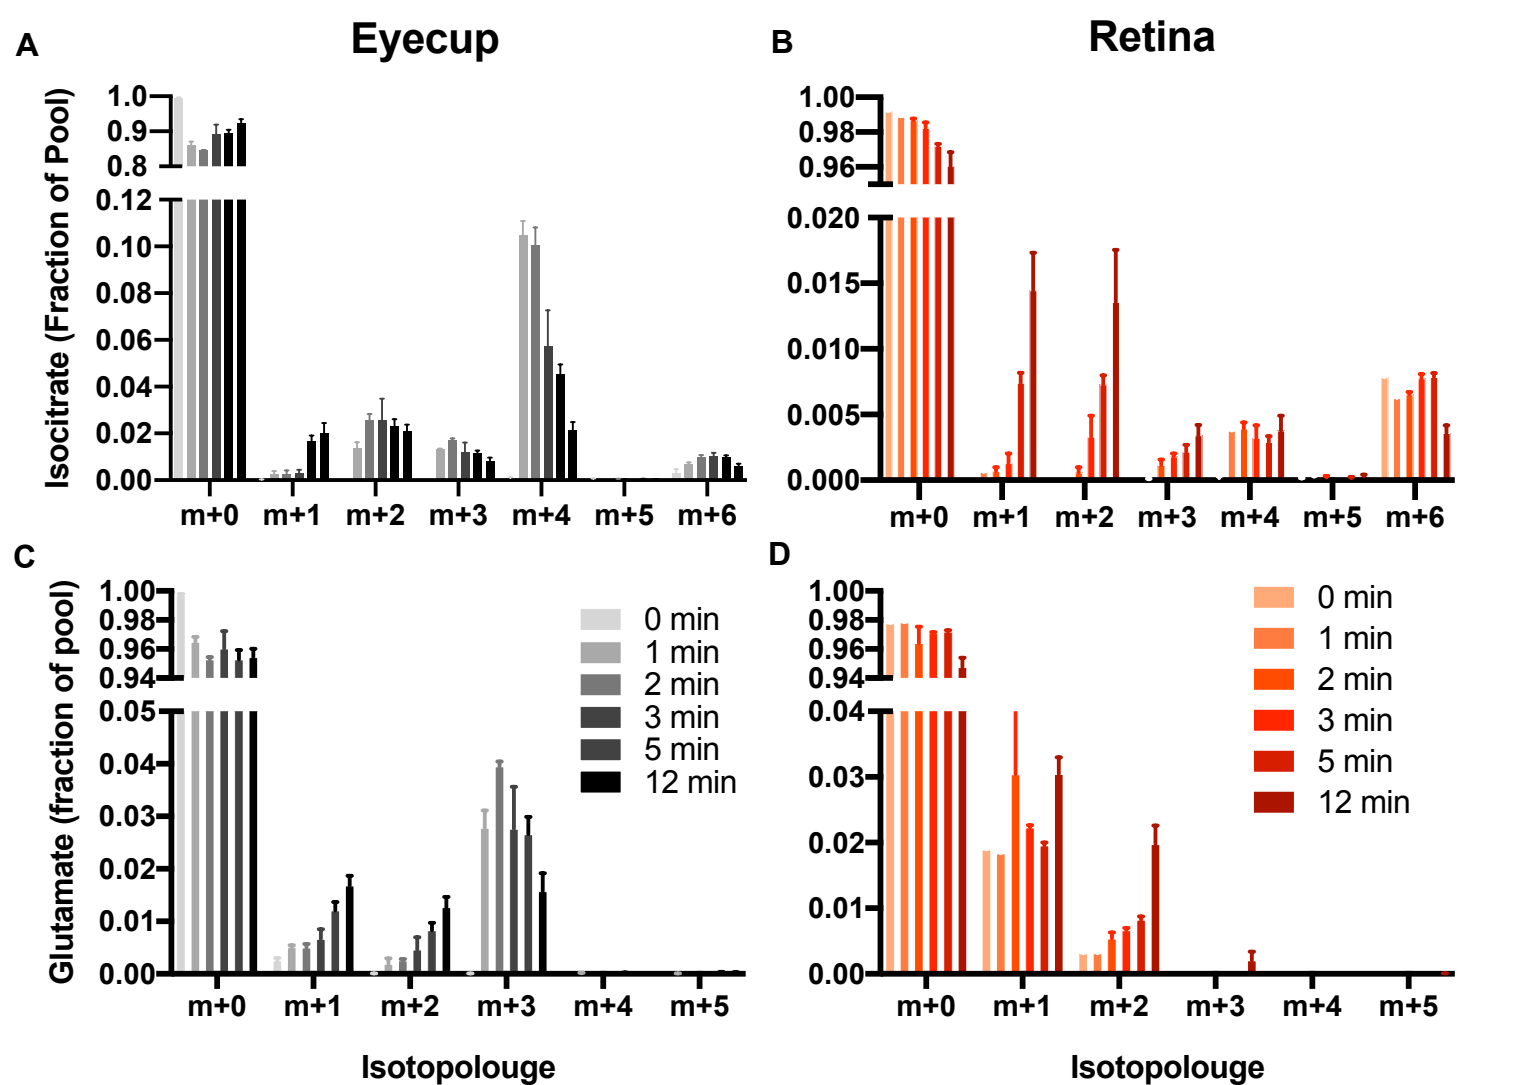

**Figure S5. Isocitrate and Glutamate Isotopologue Distributions in Retina and Eyecup Tissue Following *In Vivo* U-<sup>13</sup>C-Succinate Infusion.**

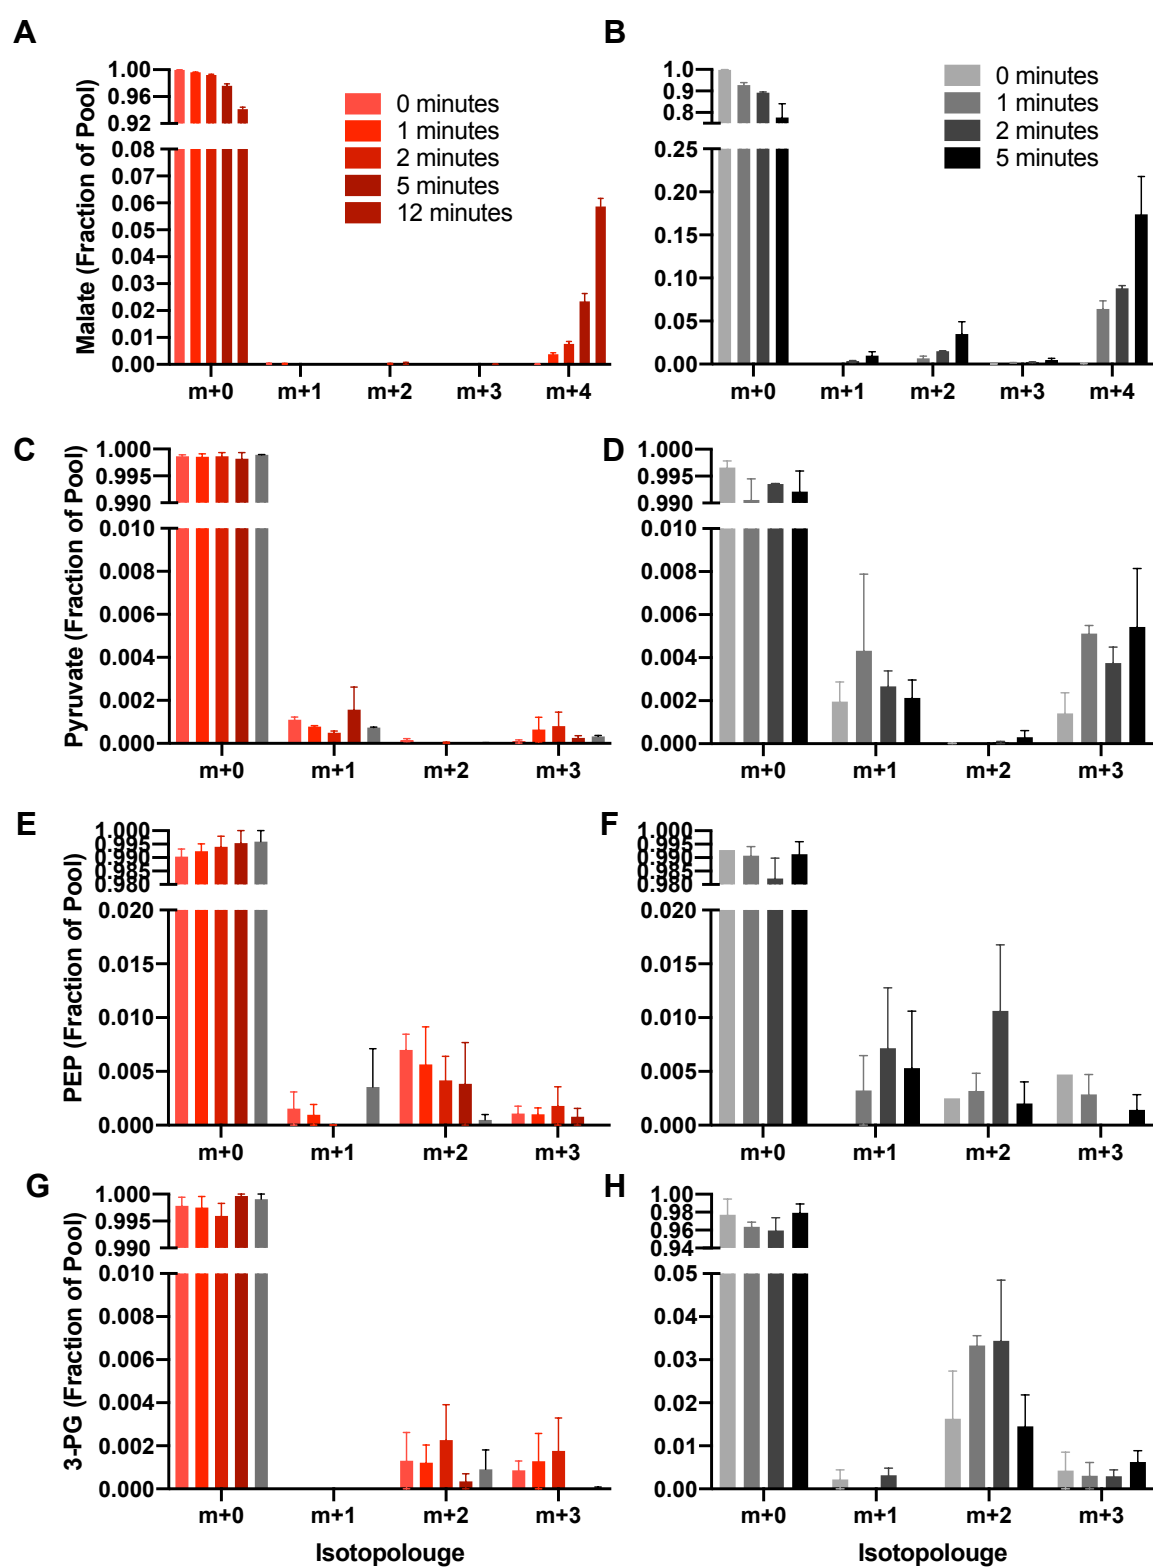

**Figure S6. Lack of Gluconeogenesis in *Ex Vivo* Retina and Eyecup Tissue.** Retina and Eyecup tissue was dissected from C57BL6/J mice in Hanks buffered salt solution. The tissue was next incubated in a Krebs-Ringer Bicarbonate Buffer supplemented with 5 mM glucose and 50  $\mu$ M U- $^{13}$ C-succinate equilibrated to 37°C at 5% CO $_2$  (n=1-3). Tissues were incubated in this buffer for 0, 1, 2, or 5 minutes and flash-frozen in liquid N $_2$ . Tissue was homogenized, derivitized, and metabolite abundance determined using gas chromatography-mass spectrometry. Relative isotopologue abundance was determined and is plotted for (A-B) malate, (C-D) pyruvate, (E-F) PEP, and (G-H) 3-PG. While carbons from labeled succinate do appear on Krebs cycle intermediates in both tissues (A-B), they do not appear to accumulate m+3 labeling on Pyruvate, PEP, or 3-PG (C-H) linearly over time as they do in vivo (Figure 4).
